# Supplementary material for: Antibacterial, Antifungal and Anticancer Activities of Compounds Produced by Newly Isolated Streptomyces Strains from the Szczelina Chochołowska Cave (Tatra Mountains, Poland)
Source: MDPI journal article supplement (doi:10.3390/antibiotics10101212), 2021-10-05
Supplement: s1 [file s1]

|                                                                                                                                                                                                                                        |                                                                                      |                       |                                                                                                                                                                                                                                                    |
|----------------------------------------------------------------------------------------------------------------------------------------------------------------------------------------------------------------------------------------|--------------------------------------------------------------------------------------|-----------------------|----------------------------------------------------------------------------------------------------------------------------------------------------------------------------------------------------------------------------------------------------|
| <p><i>Candida parapsilosis</i> D2<br/>(Bruss Laboratories, Gdynia, Poland)</p> <p><i>Candida glabrata</i> D3 (Bruss Laboratories, Gdynia, Poland)</p> <p><i>Candida tropicalis</i> D4 (Bruss Laboratories, Gdynia, Poland)</p>         | 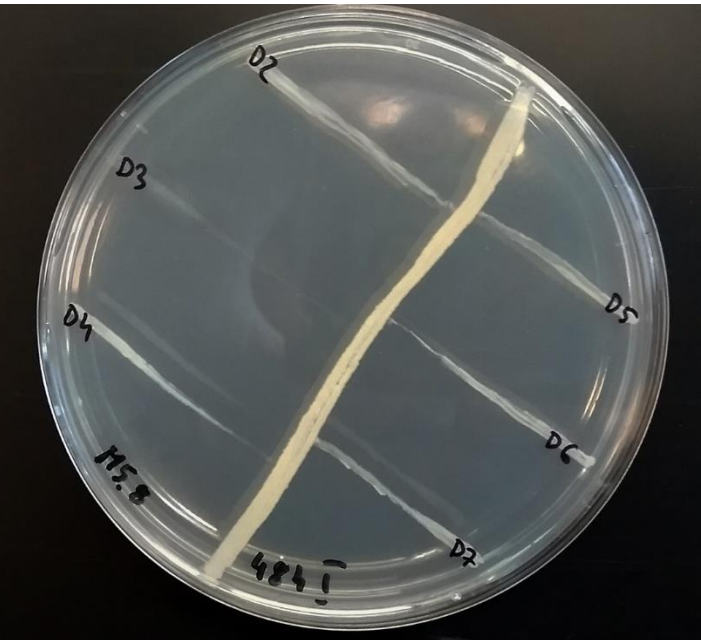   | <p>M5_8<br/>48h I</p> | <p><i>Candida dubliniensis</i> D5<br/>(Bruss Laboratories, Gdynia, Poland)</p> <p><i>Candida albicans</i> D6 (Bruss Laboratories, Gdynia, Poland)</p> <p><i>Candida albicans</i> D7<br/>(Medical University of Gdańsk)</p>                         |
| <p><i>Candida albicans</i> D8<br/>(Medical University of Gdańsk)</p> <p><i>Candida albicans</i> D9<br/>(University Clinical Centre in Gdańsk)</p> <p><i>Candida albicans</i> E1<br/>(University Clinical Centre in Gdańsk)</p>         |   | <p>M5_8 48h I</p>     | <p><i>Candida guilliermondii</i> E2<br/>(University Clinical Centre in Gdańsk)</p> <p><i>Candida guilliermondii</i> E3<br/>(University Clinical Centre in Gdańsk)</p> <p><i>Candida albicans</i> E4<br/>(University Clinical Centre in Gdańsk)</p> |
| <p><i>Candida albicans</i> E5<br/>(University Clinical Centre in Gdańsk)</p> <p><i>Candida glabrata</i> E6<br/>(University Clinical Centre in Gdańsk)</p> <p><i>Candida glabrata</i> E7<br/>(University Clinical Centre in Gdańsk)</p> |  | <p>M5_8 48h I</p>     | <p><i>Candida</i> sp. E8 (University Clinical Centre in Gdańsk)</p> <p><i>Candida</i> sp. E9 (University Clinical Centre in Gdańsk)</p>                                                                                                            |

*Candida parapsilosis* D2  
(Bruss Laboratories, Gdynia,  
Poland)

*Candida glabrata* D3 (Bruss  
Laboratories, Gdynia,  
Poland)

*Candida tropicalis* D4 (Bruss  
Laboratories, Gdynia,  
Poland)

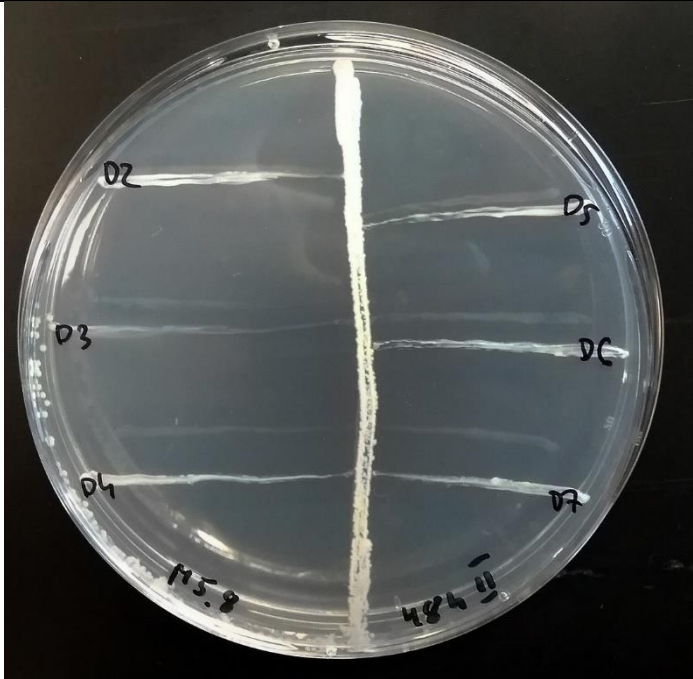

M5\_8 48h II

*Candida dubliniensis* D5  
(Bruss Laboratories, Gdynia,  
Poland)

*Candida albicans* D6 (Bruss  
Laboratories, Gdynia,  
Poland)

*Candida albicans* D7  
(Medical University of  
Gdańsk)

*Candida albicans* D8  
(Medical University of  
Gdańsk)

*Candida albicans* D9  
(University Clinical Centre in  
Gdańsk)

*Candida albicans* E1  
(University Clinical Centre in  
Gdańsk)

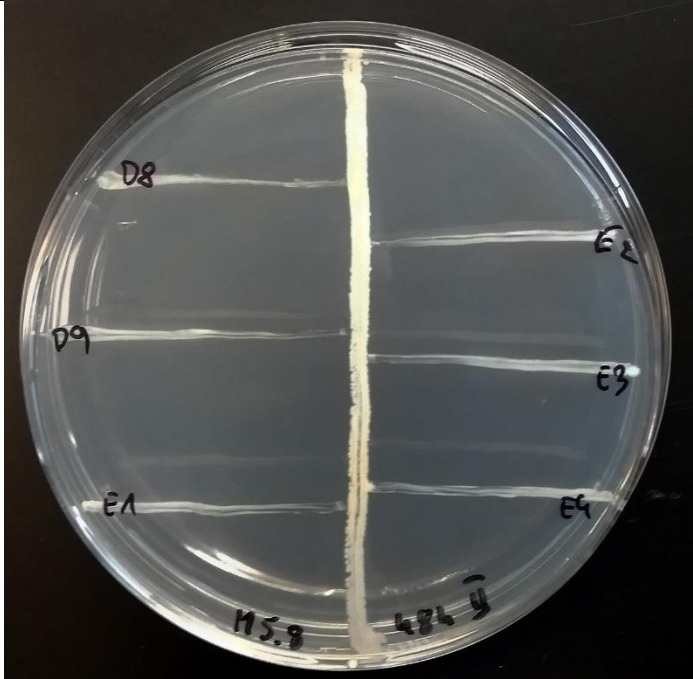

M5\_8 48h II

*Candida guilliermondii* E2  
(University Clinical Centre in  
Gdańsk)

*Candida guilliermondii* E3  
(University Clinical Centre in  
Gdańsk)

*Candida albicans* E4  
(University Clinical Centre in  
Gdańsk)

*Candida albicans* E5  
(University Clinical Centre in Gdańsk)

*Candida glabrata* E6  
(University Clinical Centre in Gdańsk)

*Candida glabrata* E7  
(University Clinical Centre in Gdańsk)

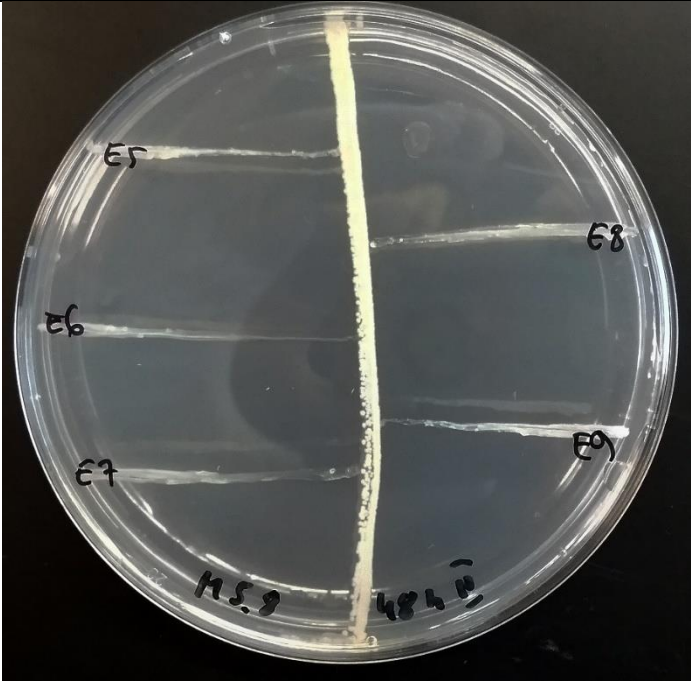

M5\_8 48h II

*Candida* sp. E8 (University Clinical Centre in Gdańsk)

*Candida* sp. E9 (University Clinical Centre in Gdańsk)

*Candida parapsilosis* D2  
(Bruss Laboratories, Gdynia, Poland)

*Candida glabrata* D3 (Bruss Laboratories, Gdynia, Poland)

*Candida tropicalis* D4 (Bruss Laboratories, Gdynia, Poland)

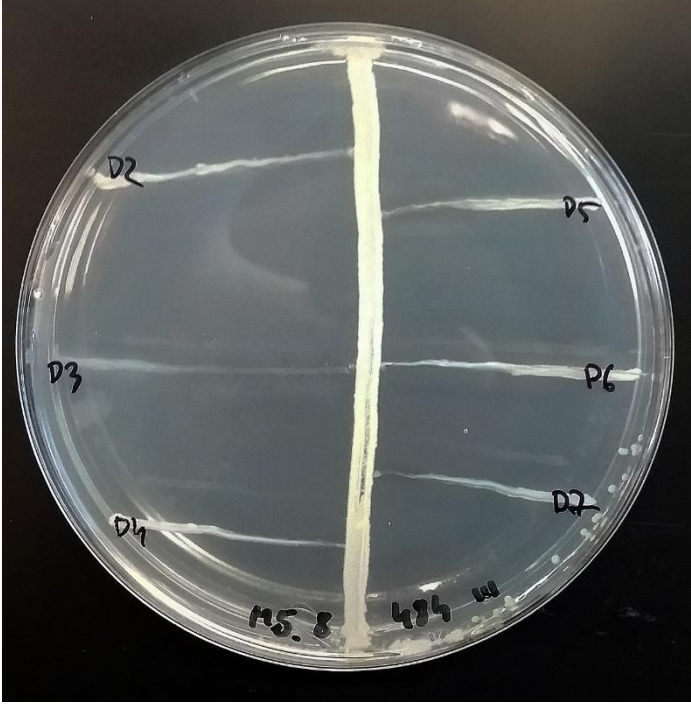

M5\_8 48h III

*Candida dubliniensis* D5  
(Bruss Laboratories, Gdynia, Poland)

*Candida albicans* D6 (Bruss Laboratories, Gdynia, Poland)

*Candida albicans* D7  
(Medical University of Gdańsk)



*Candida albicans* D8  
(Medical University of Gdańsk)

*Candida albicans* D9  
(University Clinical Centre in Gdańsk)

*Candida albicans* E1  
(University Clinical Centre in Gdańsk)

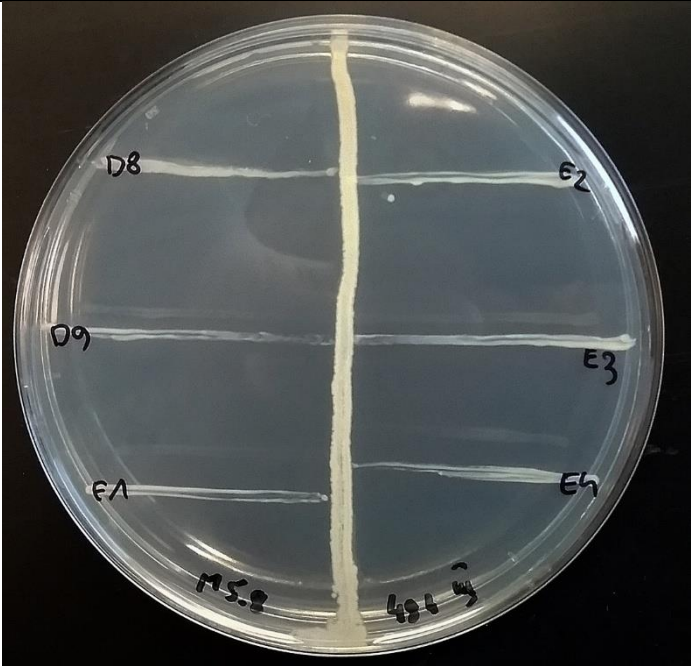

M5\_8 48h III

*Candida guilliermondii* E2  
(University Clinical Centre in Gdańsk)

*Candida guilliermondii* E3  
(University Clinical Centre in Gdańsk)

*Candida albicans* E4  
(University Clinical Centre in Gdańsk)

*Candida albicans* E5  
(University Clinical Centre in Gdańsk)

*Candida glabrata* E6  
(University Clinical Centre in Gdańsk)

*Candida glabrata* E7  
(University Clinical Centre in Gdańsk)

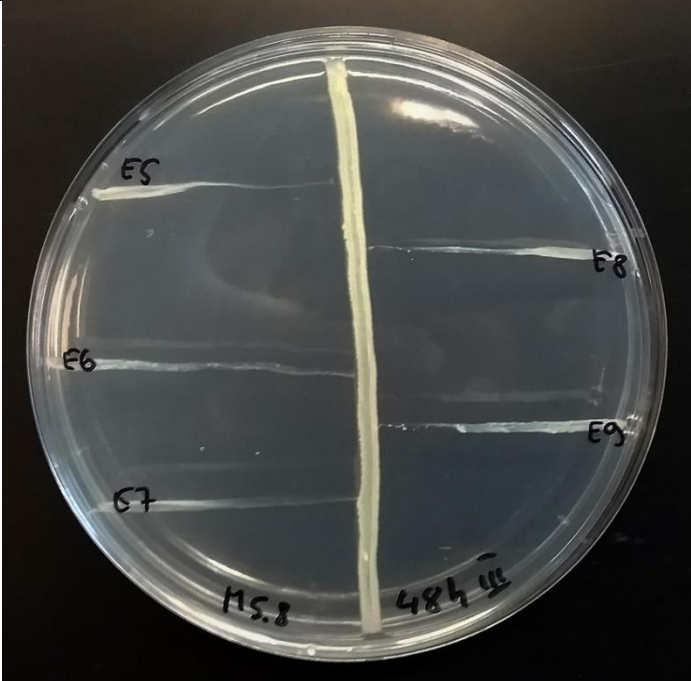

M5\_8 48h III

*Candida* sp. E8 (University Clinical Centre in Gdańsk)

*Candida* sp. E9 (University Clinical Centre in Gdańsk)

*Candida parapsilosis* D2  
(Bruss Laboratories, Gdynia,  
Poland)

*Candida glabrata* D3 (Bruss  
Laboratories, Gdynia,  
Poland)

*Candida tropicalis* D4 (Bruss  
Laboratories, Gdynia,  
Poland)

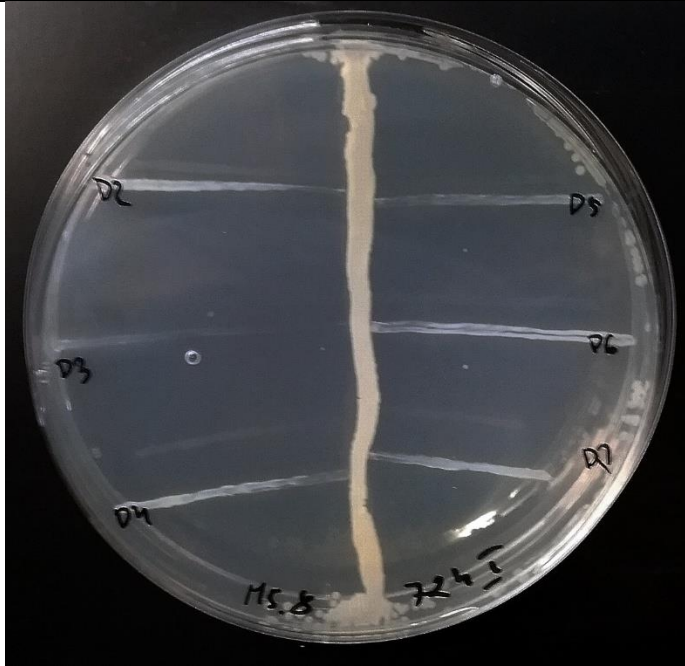

M5\_8 72h I

*Candida dubliniensis* D5  
(Bruss Laboratories, Gdynia,  
Poland)

*Candida albicans* D6 (Bruss  
Laboratories, Gdynia,  
Poland)

*Candida albicans* D7  
(Medical University of  
Gdańsk)

*Candida albicans* D8  
(Medical University of  
Gdańsk)

*Candida albicans* D9  
(University Clinical Centre in  
Gdańsk)

*Candida albicans* E1  
(University Clinical Centre in  
Gdańsk)

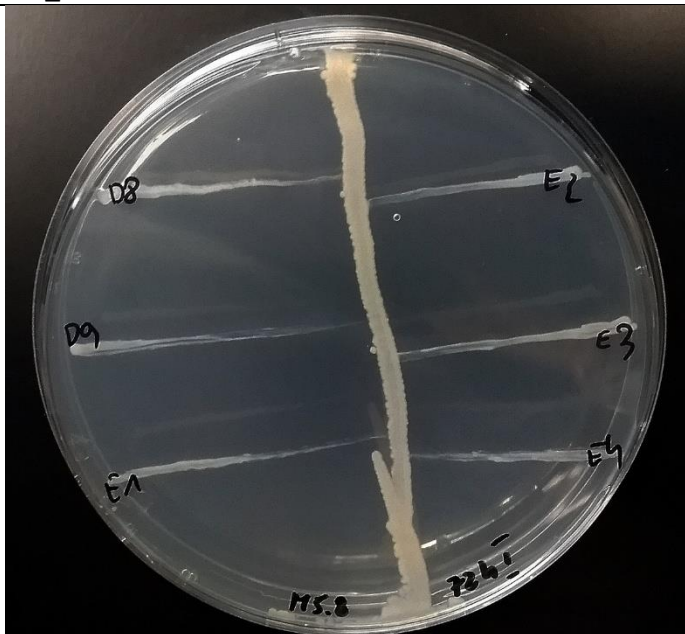

M5\_8 72h I

*Candida guilliermondii* E2  
(University Clinical Centre in  
Gdańsk)

*Candida guilliermondii* E3  
(University Clinical Centre in  
Gdańsk)

*Candida albicans* E4  
(University Clinical Centre in  
Gdańsk)

*Candida albicans* E5  
(University Clinical Centre in Gdańsk)

*Candida glabrata* E6  
(University Clinical Centre in Gdańsk)

*Candida glabrata* E7  
(University Clinical Centre in Gdańsk)

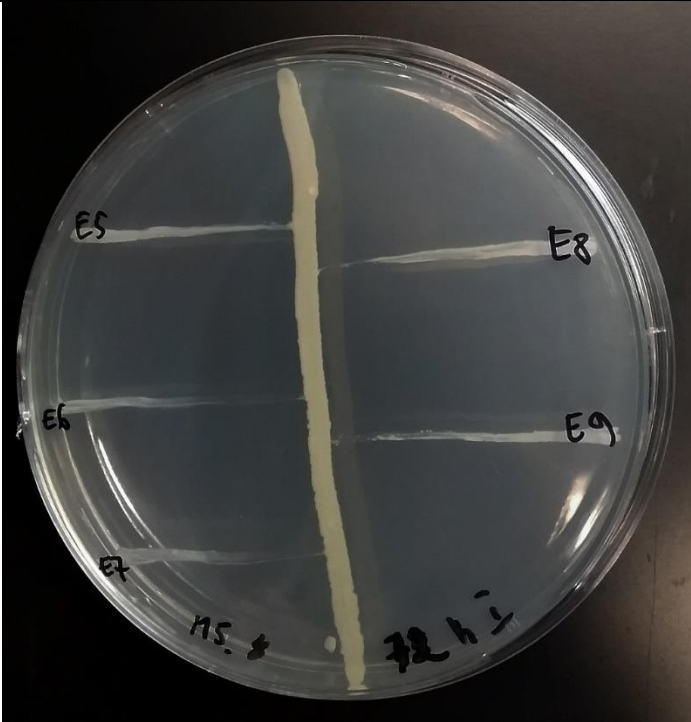

M5\_8 72h I

*Candida* sp. E8 (University Clinical Centre in Gdańsk)

*Candida* sp. E9 (University Clinical Centre in Gdańsk)

*Candida parapsilosis* D2  
(Bruss Laboratories, Gdynia, Poland)

*Candida glabrata* D3 (Bruss Laboratories, Gdynia, Poland)

*Candida tropicalis* D4 (Bruss Laboratories, Gdynia, Poland)

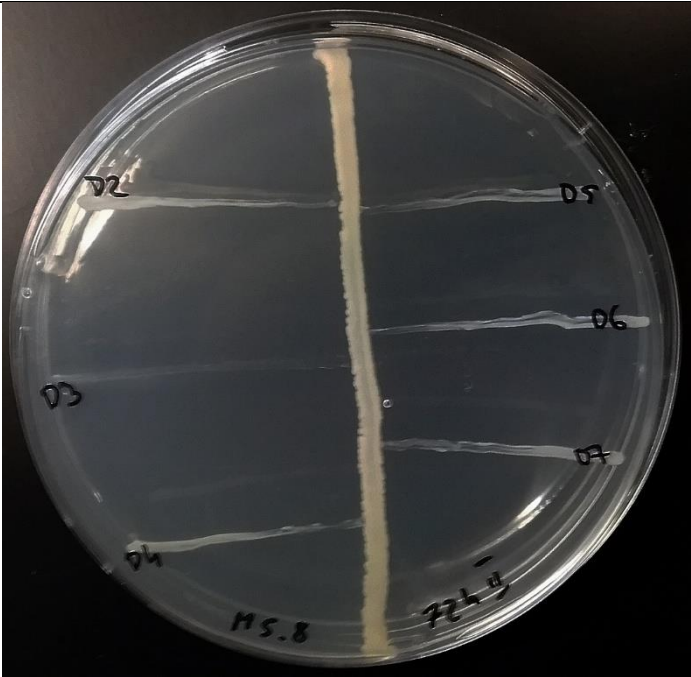

M5\_8 72h II

*Candida dubliniensis* D5  
(Bruss Laboratories, Gdynia, Poland)

*Candida albicans* D6 (Bruss Laboratories, Gdynia, Poland)

*Candida albicans* D7  
(Medical University of Gdańsk)



*Candida albicans* D8  
(Medical University of Gdańsk)

*Candida albicans* D9  
(University Clinical Centre in Gdańsk)

*Candida albicans* E1  
(University Clinical Centre in Gdańsk)

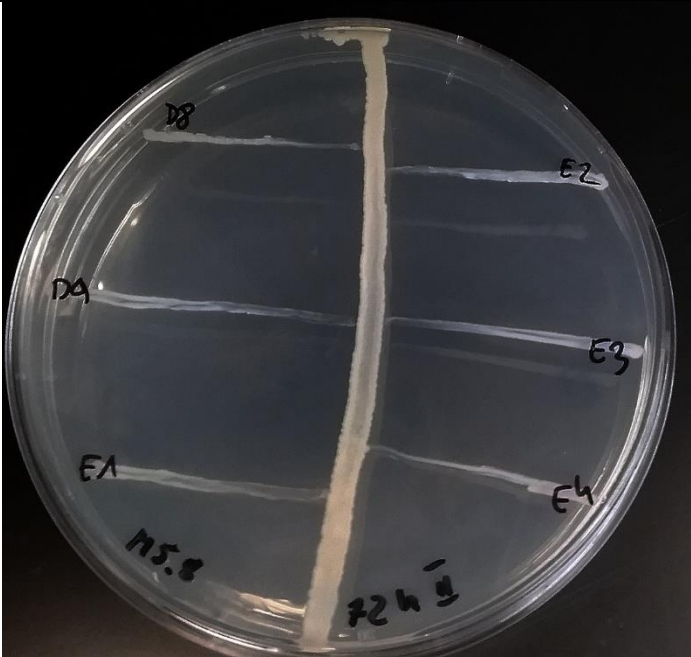

M5\_8 72h II

*Candida guilliermondii* E2  
(University Clinical Centre in Gdańsk)

*Candida guilliermondii* E3  
(University Clinical Centre in Gdańsk)

*Candida albicans* E4  
(University Clinical Centre in Gdańsk)

*Candida albicans* E5  
(University Clinical Centre in Gdańsk)

*Candida glabrata* E6  
(University Clinical Centre in Gdańsk)

*Candida glabrata* E7  
(University Clinical Centre in Gdańsk)

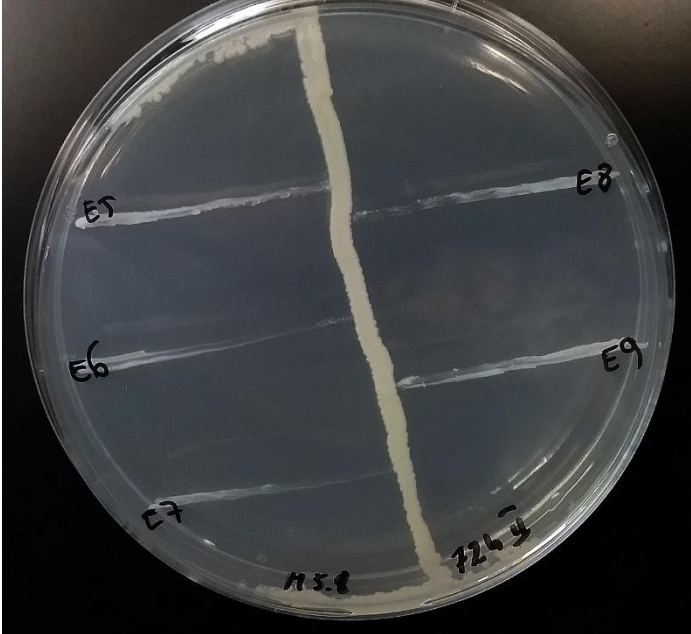

M5\_8 72h II

*Candida* sp. E8 (University Clinical Centre in Gdańsk)

*Candida* sp. E9 (University Clinical Centre in Gdańsk)

*Candida parapsilosis* D2  
(Bruss Laboratories, Gdynia, Poland)

*Candida glabrata* D3 (Bruss Laboratories, Gdynia, Poland)

*Candida tropicalis* D4 (Bruss Laboratories, Gdynia, Poland)

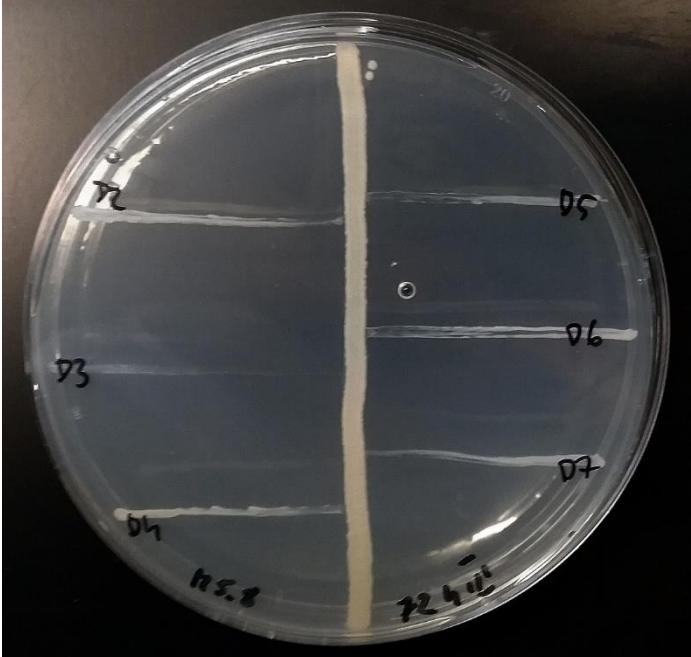

*Candida dubliniensis* D5  
(Bruss Laboratories, Gdynia, Poland)

*Candida albicans* D6 (Bruss Laboratories, Gdynia, Poland)

*Candida albicans* D7  
(Medical University of Gdańsk)

|                                                                                                                                                                                                                                        |                                                                                     |                                                                                                                                                                                                                                                    |
|----------------------------------------------------------------------------------------------------------------------------------------------------------------------------------------------------------------------------------------|-------------------------------------------------------------------------------------|----------------------------------------------------------------------------------------------------------------------------------------------------------------------------------------------------------------------------------------------------|
|                                                                                                                                                                                                                                        | M5_8 7h III                                                                         |                                                                                                                                                                                                                                                    |
| <p><i>Candida albicans</i> D8<br/>(Medical University of Gdańsk)</p> <p><i>Candida albicans</i> D9<br/>(University Clinical Centre in Gdańsk)</p> <p><i>Candida albicans</i> E1<br/>(University Clinical Centre in Gdańsk)</p>         | 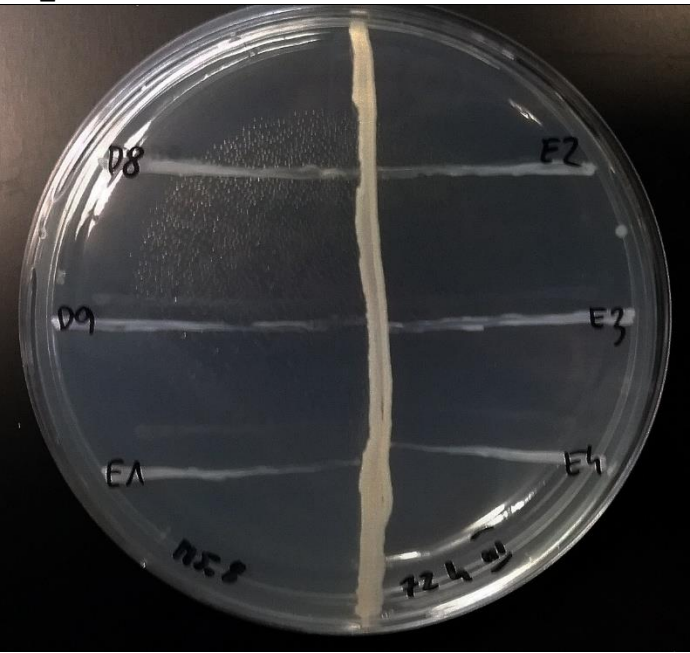  | <p><i>Candida guilliermondii</i> E2<br/>(University Clinical Centre in Gdańsk)</p> <p><i>Candida guilliermondii</i> E3<br/>(University Clinical Centre in Gdańsk)</p> <p><i>Candida albicans</i> E4<br/>(University Clinical Centre in Gdańsk)</p> |
| <p><i>Candida albicans</i> E5<br/>(University Clinical Centre in Gdańsk)</p> <p><i>Candida glabrata</i> E6<br/>(University Clinical Centre in Gdańsk)</p> <p><i>Candida glabrata</i> E7<br/>(University Clinical Centre in Gdańsk)</p> |  | <p><i>Candida</i> sp. E8 (University Clinical Centre in Gdańsk)</p> <p><i>Candida</i> sp. E9 (University Clinical Centre in Gdańsk)</p>                                                                                                            |
|                                                                                                                                                                                                                                        | M5_8 72h III                                                                        |                                                                                                                                                                                                                                                    |



*Candida parapsilosis* D2  
(Bruss Laboratories, Gdynia,  
Poland)

*Candida glabrata* D3 (Bruss  
Laboratories, Gdynia,  
Poland)

*Candida tropicalis* D4 (Bruss  
Laboratories, Gdynia,  
Poland)

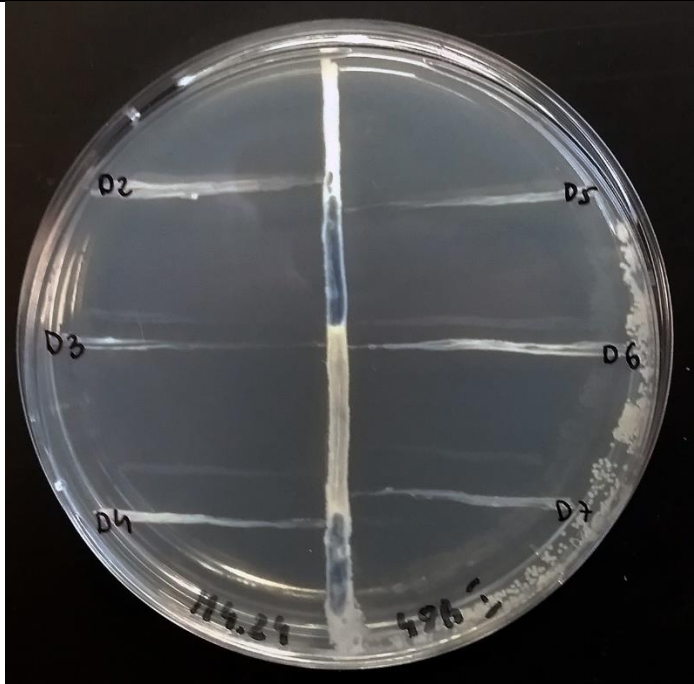

M4\_24 48h I

*Candida dubliniensis* D5  
(Bruss Laboratories, Gdynia,  
Poland)

*Candida albicans* D6 (Bruss  
Laboratories, Gdynia,  
Poland)

*Candida albicans* D7  
(Medical University of  
Gdańsk)

*Candida albicans* D8  
(Medical University of  
Gdańsk)

*Candida albicans* D9  
(University Clinical Centre in  
Gdańsk)

*Candida albicans* E1  
(University Clinical Centre in  
Gdańsk)

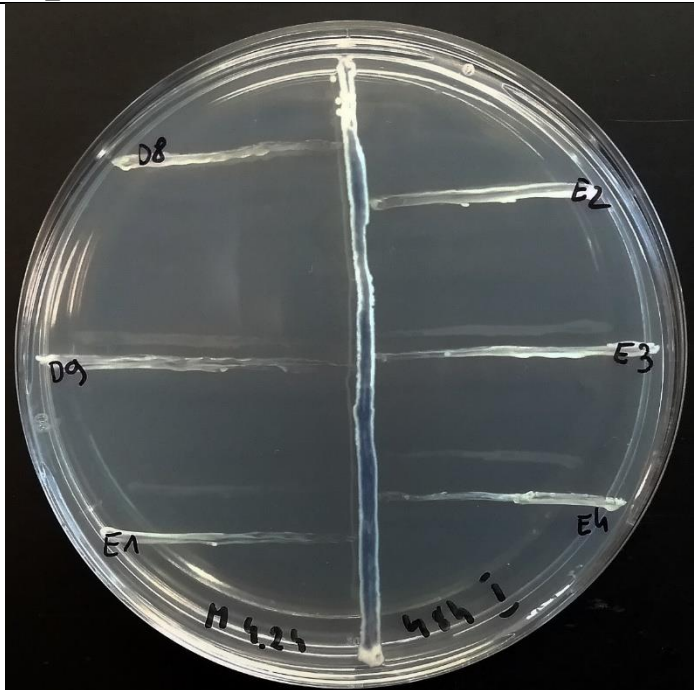

M4\_24 48h I

*Candida guilliermondii* E2  
(University Clinical Centre in  
Gdańsk)

*Candida guilliermondii* E3  
(University Clinical Centre in  
Gdańsk)

*Candida albicans* E4  
(University Clinical Centre in  
Gdańsk)

*Candida albicans* E5  
(University Clinical Centre in Gdańsk)

*Candida glabrata* E6  
(University Clinical Centre in Gdańsk)

*Candida glabrata* E7  
(University Clinical Centre in Gdańsk)

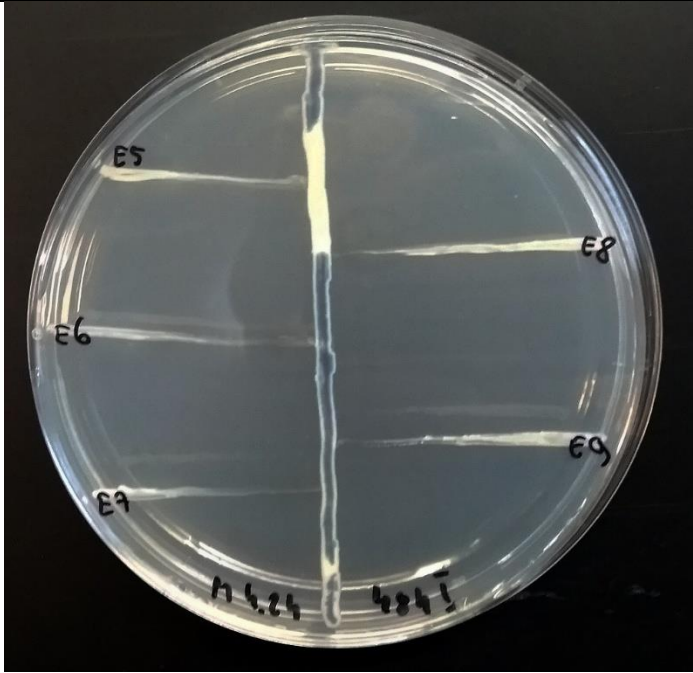

M4\_24 48h I

*Candida* sp. E8 (University Clinical Centre in Gdańsk)

*Candida* sp. E9 (University Clinical Centre in Gdańsk)

*Candida parapsilosis* D2  
(Bruss Laboratories, Gdynia, Poland)

*Candida glabrata* D3 (Bruss Laboratories, Gdynia, Poland)

*Candida tropicalis* D4 (Bruss Laboratories, Gdynia, Poland)

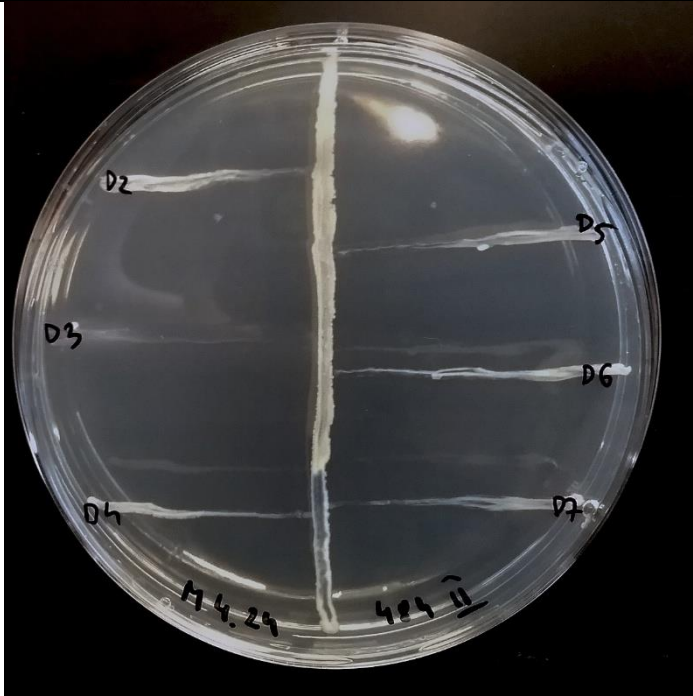

M4\_24 48h II

*Candida dubliniensis* D5  
(Bruss Laboratories, Gdynia, Poland)

*Candida albicans* D6 (Bruss Laboratories, Gdynia, Poland)

*Candida albicans* D7  
(Medical University of Gdańsk)

*Candida albicans* D8  
(Medical University of Gdańsk)

*Candida albicans* D9  
(University Clinical Centre in Gdańsk)

*Candida albicans* E1  
(University Clinical Centre in Gdańsk)

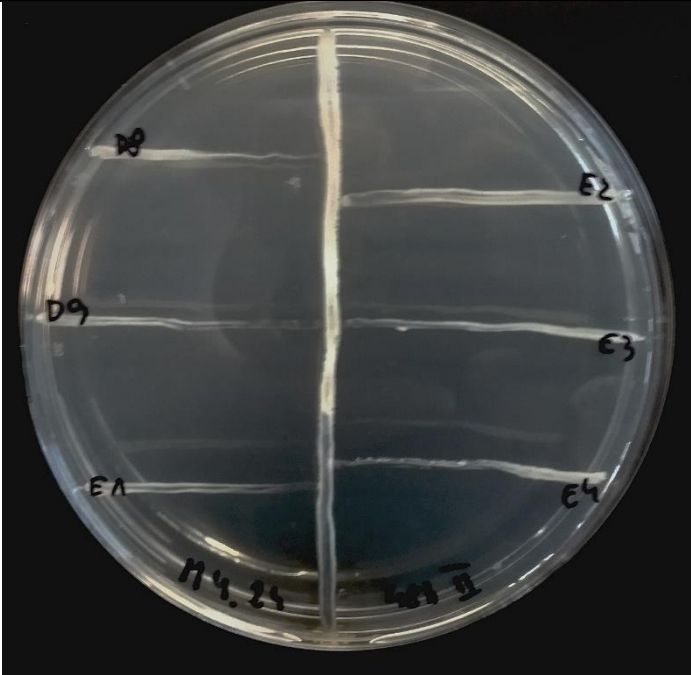

M4\_24 48h II

*Candida guilliermondii* E2  
(University Clinical Centre in Gdańsk)

*Candida guilliermondii* E3  
(University Clinical Centre in Gdańsk)

*Candida albicans* E4  
(University Clinical Centre in Gdańsk)

*Candida albicans* E5  
(University Clinical Centre in Gdańsk)

*Candida glabrata* E6  
(University Clinical Centre in Gdańsk)

*Candida glabrata* E7  
(University Clinical Centre in Gdańsk)

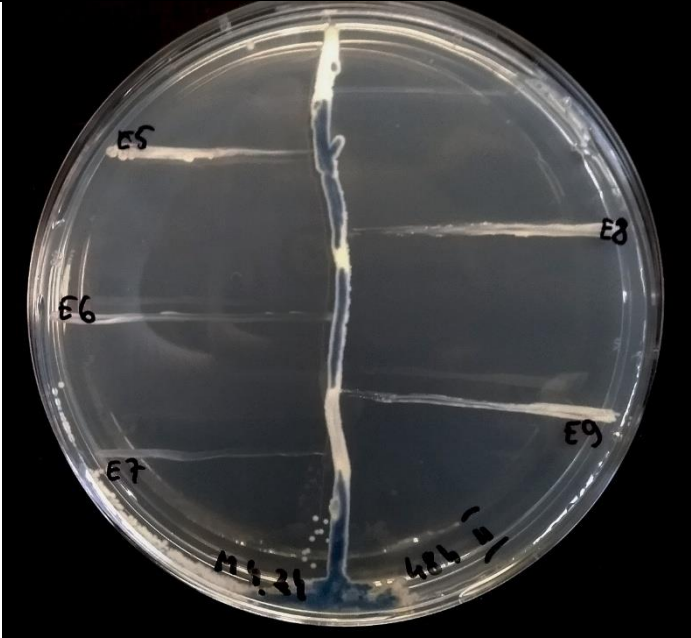

M4\_24 48h II

*Candida* sp. E8 (University Clinical Centre in Gdańsk)

*Candida* sp. E9 (University Clinical Centre in Gdańsk)



*Candida parapsilosis* D2  
(Bruss Laboratories, Gdynia,  
Poland)

*Candida glabrata* D3 (Bruss  
Laboratories, Gdynia,  
Poland)

*Candida tropicalis* D4 (Bruss  
Laboratories, Gdynia,  
Poland)

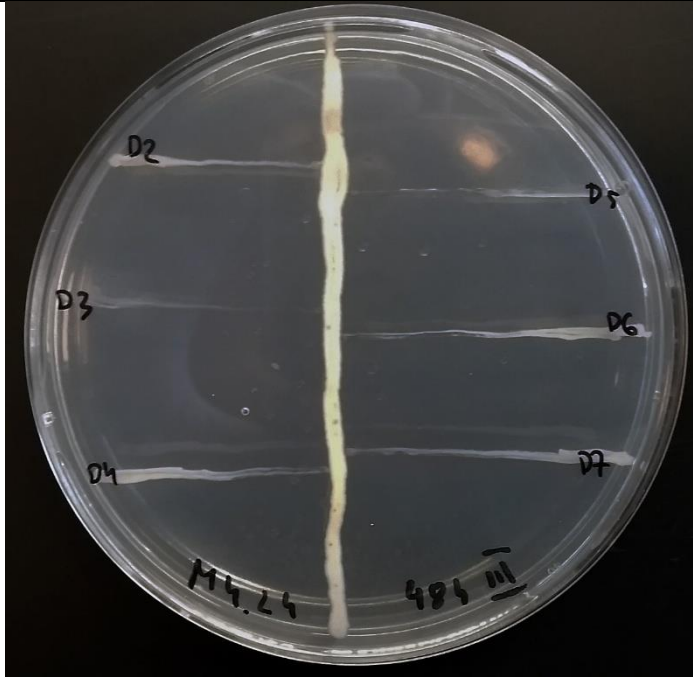

M4\_24 48h III

*Candida dubliniensis* D5  
(Bruss Laboratories, Gdynia,  
Poland)

*Candida albicans* D6 (Bruss  
Laboratories, Gdynia,  
Poland)

*Candida albicans* D7  
(Medical University of  
Gdańsk)

*Candida albicans* D8  
(Medical University of  
Gdańsk)

*Candida albicans* D9  
(University Clinical Centre in  
Gdańsk)

*Candida albicans* E1  
(University Clinical Centre in  
Gdańsk)

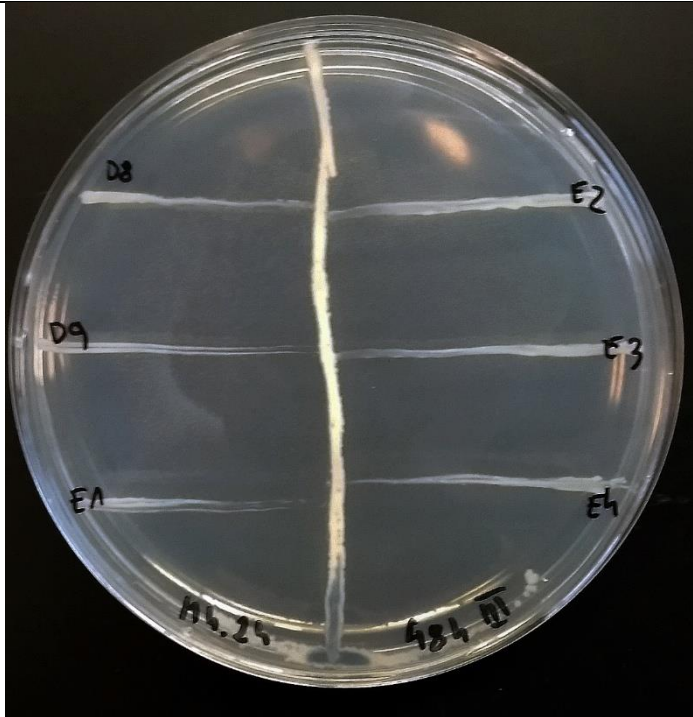

M4\_24 48h III

*Candida guilliermondii* E2  
(University Clinical Centre in  
Gdańsk)

*Candida guilliermondii* E3  
(University Clinical Centre in  
Gdańsk)

*Candida albicans* E4  
(University Clinical Centre in  
Gdańsk)

*Candida albicans* E5  
(University Clinical Centre in Gdańsk)

*Candida glabrata* E6  
(University Clinical Centre in Gdańsk)

*Candida glabrata* E7  
(University Clinical Centre in Gdańsk)

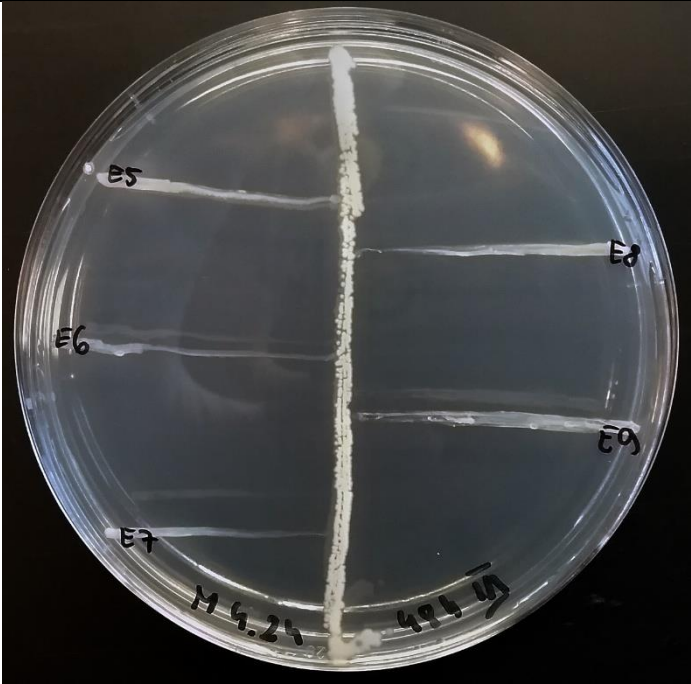

M4\_24 48h III

*Candida* sp. E8 (University Clinical Centre in Gdańsk)

*Candida* sp. E9 (University Clinical Centre in Gdańsk)

*Candida parapsilosis* D2  
(Bruss Laboratories, Gdynia, Poland)

*Candida glabrata* D3 (Bruss Laboratories, Gdynia, Poland)

*Candida tropicalis* D4 (Bruss Laboratories, Gdynia, Poland)

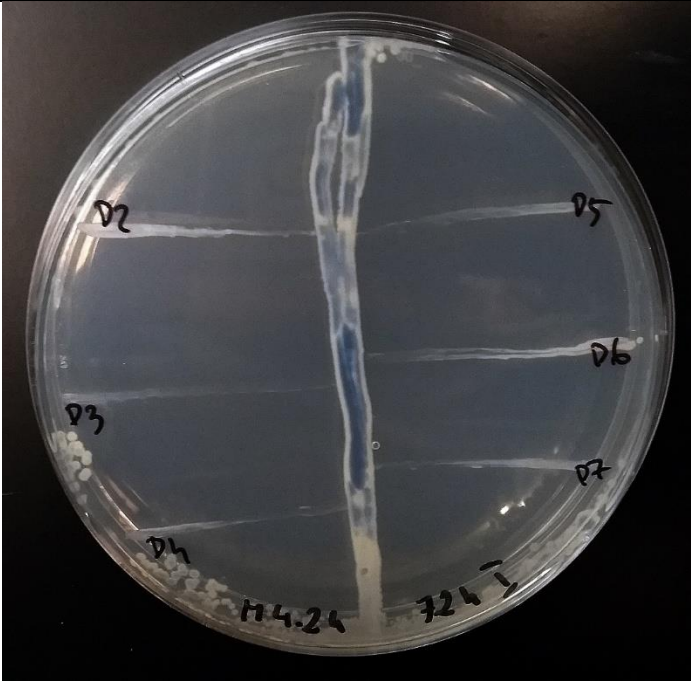

M4\_24 72h I

*Candida dubliniensis* D5  
(Bruss Laboratories, Gdynia, Poland)

*Candida albicans* D6 (Bruss Laboratories, Gdynia, Poland)

*Candida albicans* D7  
(Medical University of Gdańsk)

*Candida albicans* D8  
(Medical University of Gdańsk)

*Candida albicans* D9  
(University Clinical Centre in Gdańsk)

*Candida albicans* E1  
(University Clinical Centre in Gdańsk)

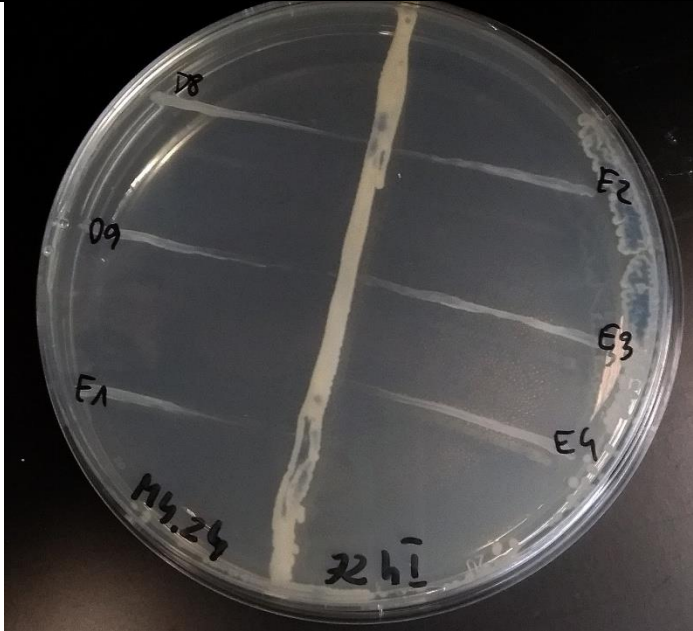

M4\_24 72h I

*Candida guilliermondii* E2  
(University Clinical Centre in Gdańsk)

*Candida guilliermondii* E3  
(University Clinical Centre in Gdańsk)

*Candida albicans* E4  
(University Clinical Centre in Gdańsk)

*Candida albicans* E5  
(University Clinical Centre in Gdańsk)

*Candida glabrata* E6  
(University Clinical Centre in Gdańsk)

*Candida glabrata* E7  
(University Clinical Centre in Gdańsk)

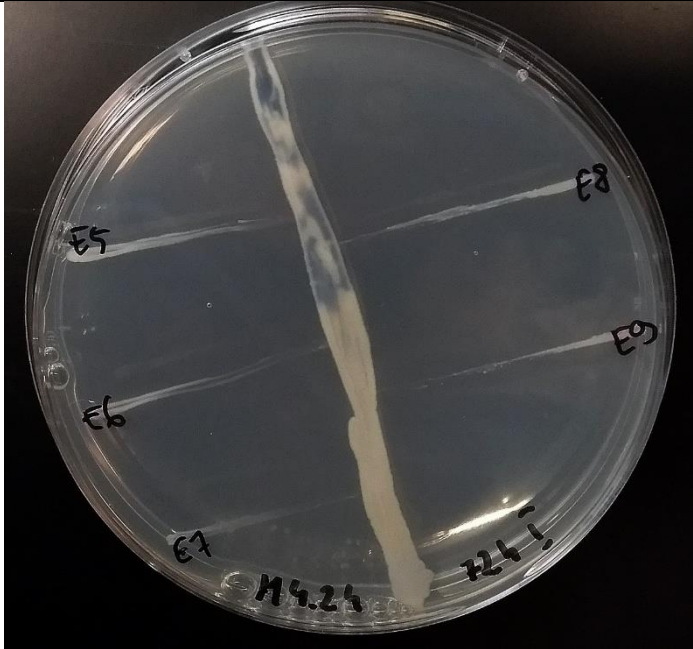

M4\_24 72h I

*Candida* sp. E8 (University Clinical Centre in Gdańsk)

*Candida* sp. E9 (University Clinical Centre in Gdańsk)

*Candida parapsilosis* D2  
(Bruss Laboratories, Gdynia, Poland)

*Candida glabrata* D3 (Bruss Laboratories, Gdynia, Poland)

*Candida tropicalis* D4 (Bruss Laboratories, Gdynia, Poland)

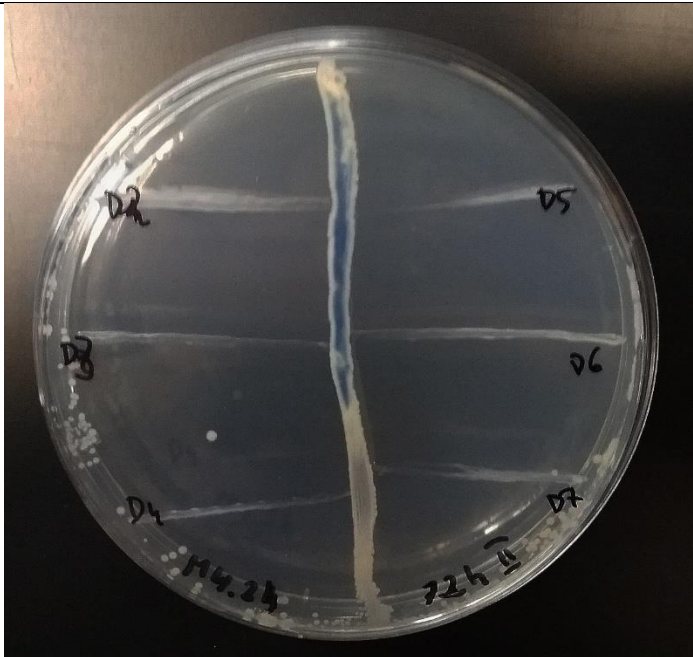

M4\_24 72h II

*Candida dubliniensis* D5  
(Bruss Laboratories, Gdynia, Poland)

*Candida albicans* D6 (Bruss Laboratories, Gdynia, Poland)

*Candida albicans* D7  
(Medical University of Gdańsk)



*Candida albicans* D8  
(Medical University of Gdańsk)

*Candida albicans* D9  
(University Clinical Centre in Gdańsk)

*Candida albicans* E1  
(University Clinical Centre in Gdańsk)

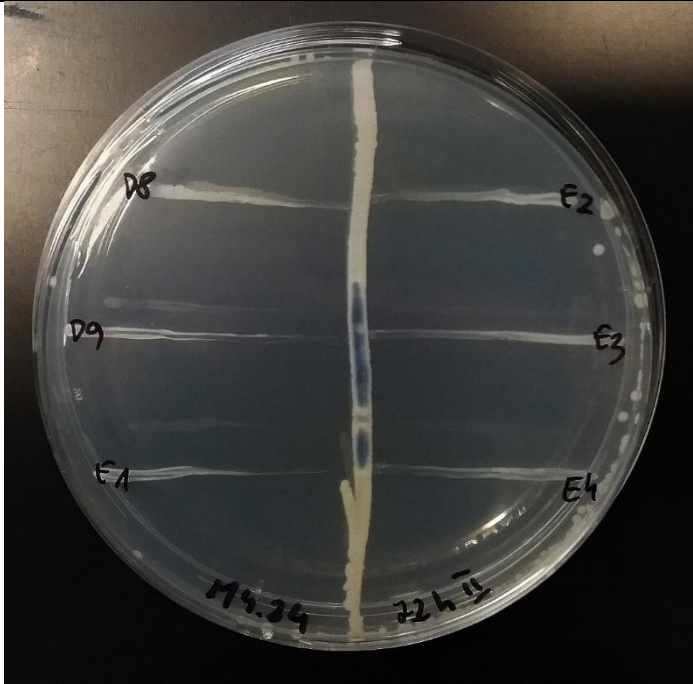

M4\_24 72h II

*Candida guilliermondii* E2  
(University Clinical Centre in Gdańsk)

*Candida guilliermondii* E3  
(University Clinical Centre in Gdańsk)

*Candida albicans* E4  
(University Clinical Centre in Gdańsk)

*Candida albicans* E5  
(University Clinical Centre in Gdańsk)

*Candida glabrata* E6  
(University Clinical Centre in Gdańsk)

*Candida glabrata* E7  
(University Clinical Centre in Gdańsk)

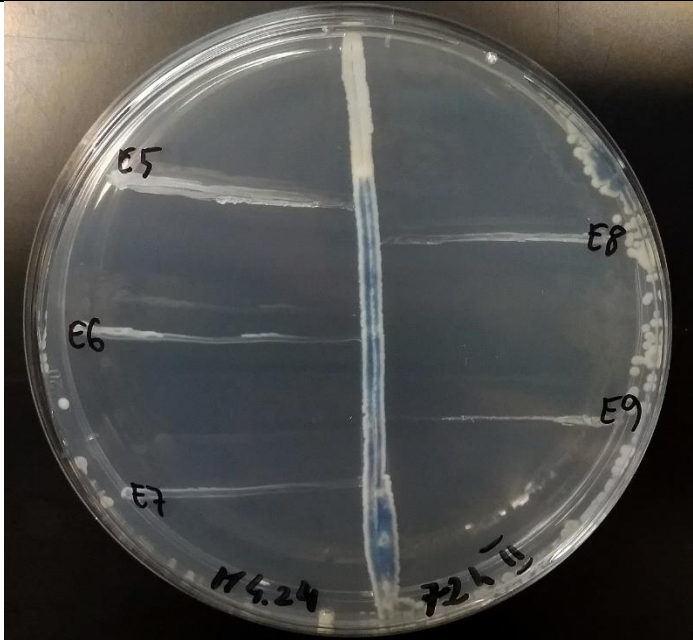

M4\_24 72h II

*Candida* sp. E8 (University Clinical Centre in Gdańsk)

*Candida* sp. E9 (University Clinical Centre in Gdańsk)

*Candida parapsilosis* D2  
(Bruss Laboratories, Gdynia,  
Poland)

*Candida glabrata* D3 (Bruss  
Laboratories, Gdynia,  
Poland)

*Candida tropicalis* D4 (Bruss  
Laboratories, Gdynia,  
Poland)

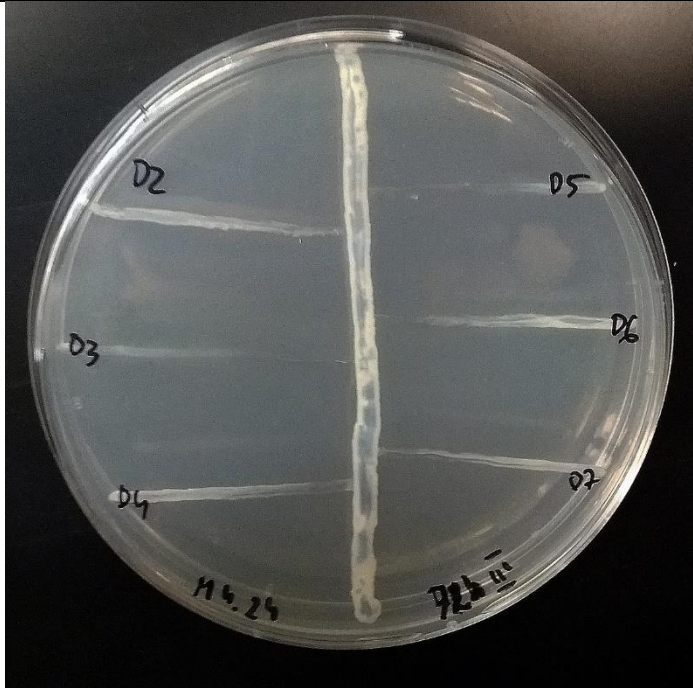

M4\_24 72h III

*Candida dubliniensis* D5  
(Bruss Laboratories, Gdynia,  
Poland)

*Candida albicans* D6 (Bruss  
Laboratories, Gdynia,  
Poland)

*Candida albicans* D7  
(Medical University of  
Gdańsk)

*Candida albicans* D8  
(Medical University of  
Gdańsk)

*Candida albicans* D9  
(University Clinical Centre in  
Gdańsk)

*Candida albicans* E1  
(University Clinical Centre in  
Gdańsk)

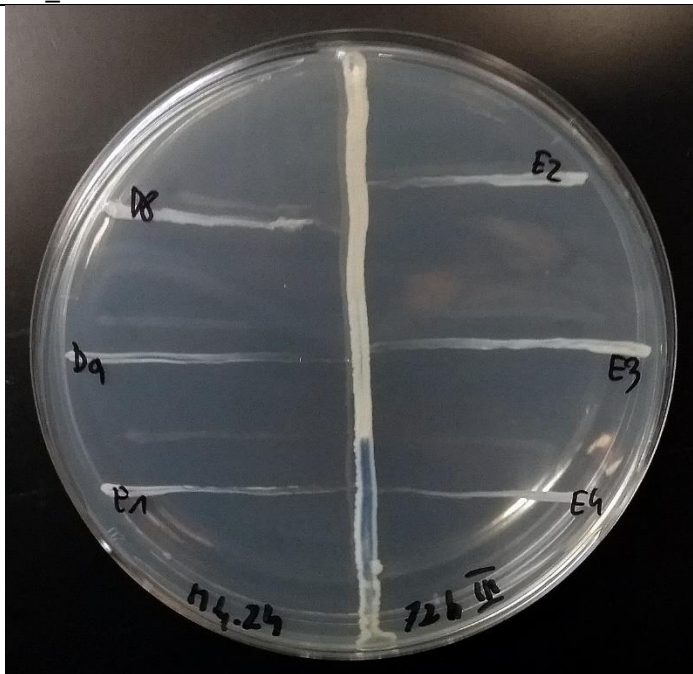

M4\_24 72h III

*Candida guilliermondii* E2  
(University Clinical Centre in  
Gdańsk)

*Candida guilliermondii* E3  
(University Clinical Centre in  
Gdańsk)

*Candida albicans* E4  
(University Clinical Centre in  
Gdańsk)

*Candida albicans* E5  
(University Clinical Centre in Gdańsk)

*Candida glabrata* E6  
(University Clinical Centre in Gdańsk)

*Candida glabrata* E7  
(University Clinical Centre in Gdańsk)

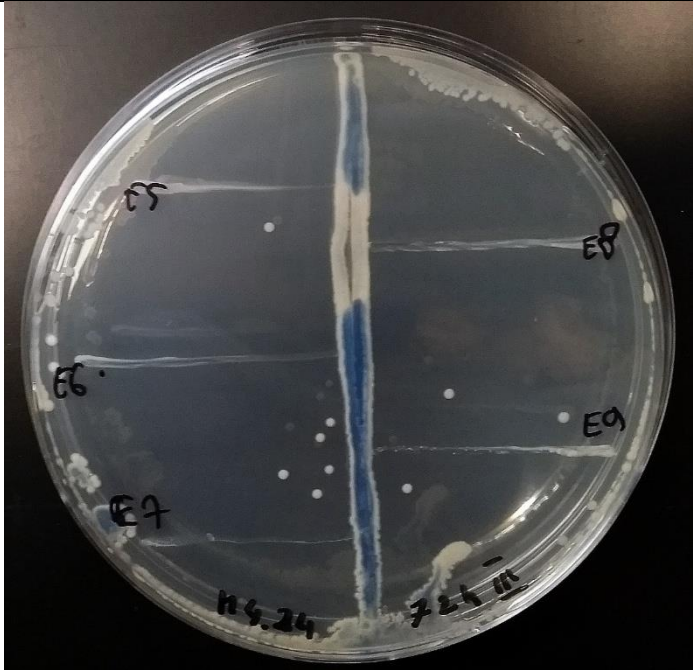

M4\_24 72h III

*Candida* sp. E8 (University Clinical Centre in Gdańsk)

*Candida* sp. E9 (University Clinical Centre in Gdańsk)

*Staphylococcus aureus* MRSA 297 (Medical University of Gdańsk)

*Staphylococcus aureus* MRSA 202 (Medical University of Gdańsk)

*Staphylococcus aureus* MRSA 342 (Medical University of Gdańsk)

*Staphylococcus aureus* MRSA 199 (Medical University of Gdańsk)

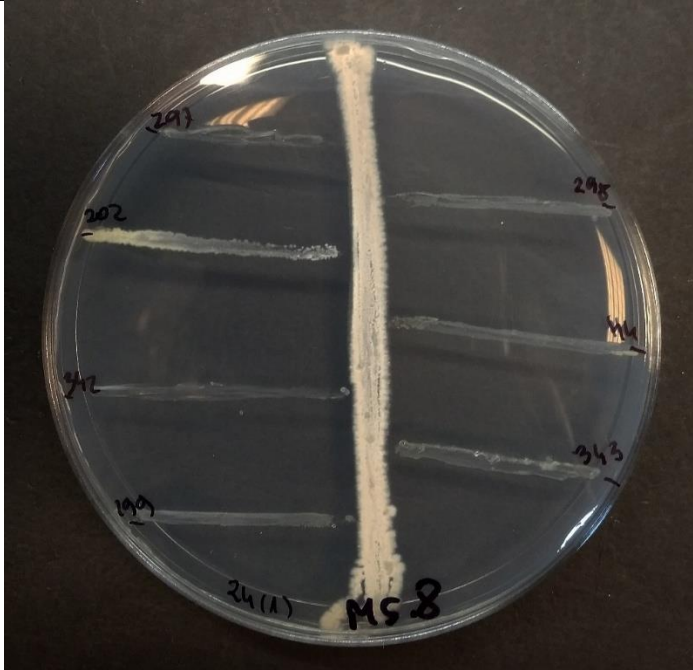

M5\_8 24h I

*Staphylococcus aureus* MRSA 298 (Medical University of Gdańsk)

*Staphylococcus aureus* MRSA 44 (Medical University of Gdańsk)

*Staphylococcus aureus* MRSA 343 (Medical University of Gdańsk)



*Staphylococcus aureus*  
MRSA 352 (Medical  
University of Gdańsk)

*Staphylococcus aureus*  
MRSA 116 (Medical  
University of Gdańsk)

*Staphylococcus aureus*  
MRSA 115 (Medical  
University of Gdańsk)

*Staphylococcus aureus*  
MRSA 122 (Medical  
University of Gdańsk)

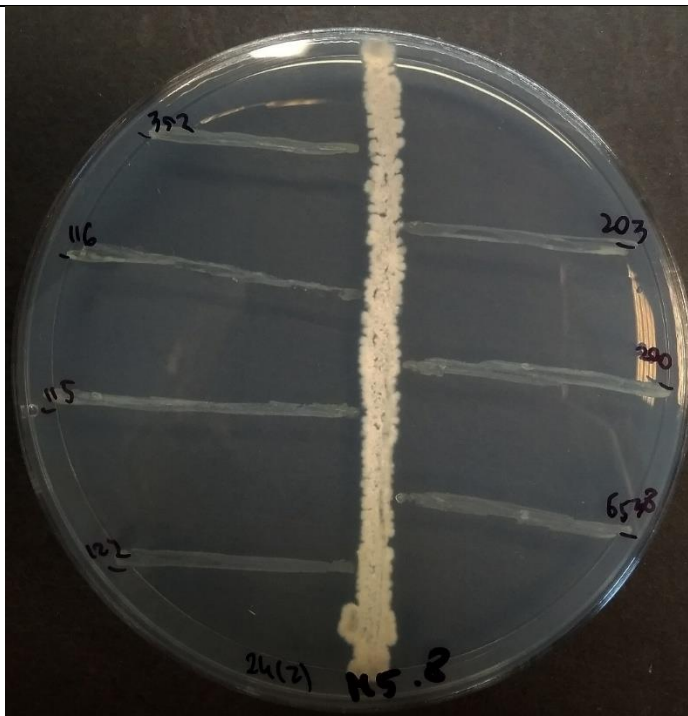

M5\_8 24h II

*Staphylococcus aureus*  
MRSA 203 (Medical  
University of Gdańsk)

*Staphylococcus aureus*  
MRSA 200 (Medical  
University of Gdańsk)

*Staphylococcus aureus*  
MRSA ATCC 6538 (Medical  
University of Gdańsk)

*Staphylococcus aureus*  
MRSA 271 (Medical  
University of Gdańsk)

*Staphylococcus aureus*  
MRSA 108 (Medical  
University of Gdańsk)

*Staphylococcus aureus*  
MRSA 124 (Medical  
University of Gdańsk)

*Staphylococcus aureus*  
MRSA 149 (Medical  
University of Gdańsk)

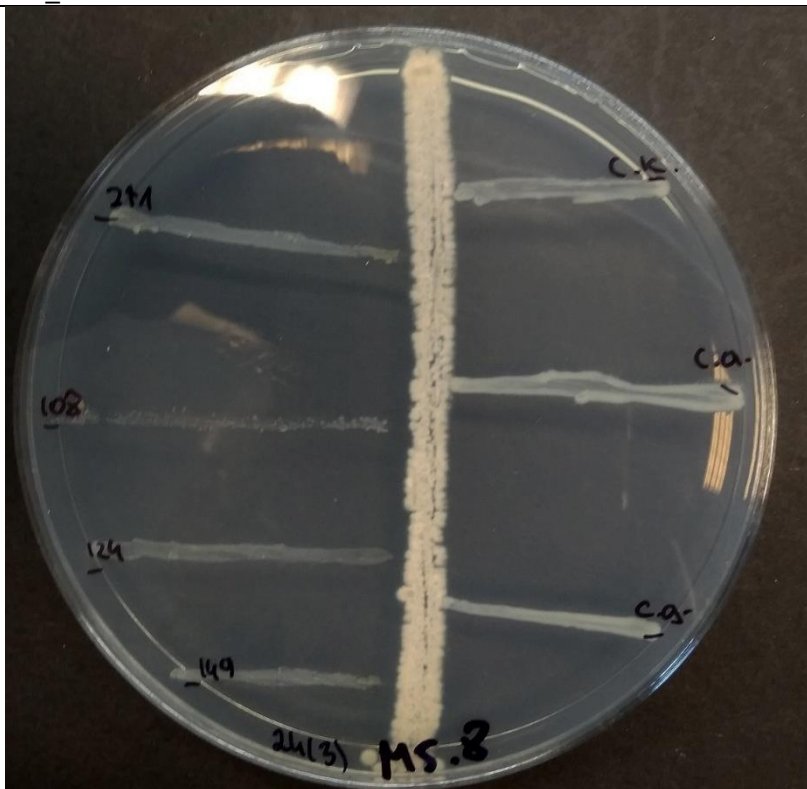

M5\_8 24h III

-  
-  
-  
(to są candida nieopisane  
w publikacji)

*Staphylococcus aureus*  
MRSA 297 (Medical  
University of Gdańsk)

*Staphylococcus aureus*  
MRSA 202 (Medical  
University of Gdańsk)

*Staphylococcus aureus*  
MRSA 342 (Medical  
University of Gdańsk)

*Staphylococcus aureus*  
MRSA 199 (Medical  
University of Gdańsk)

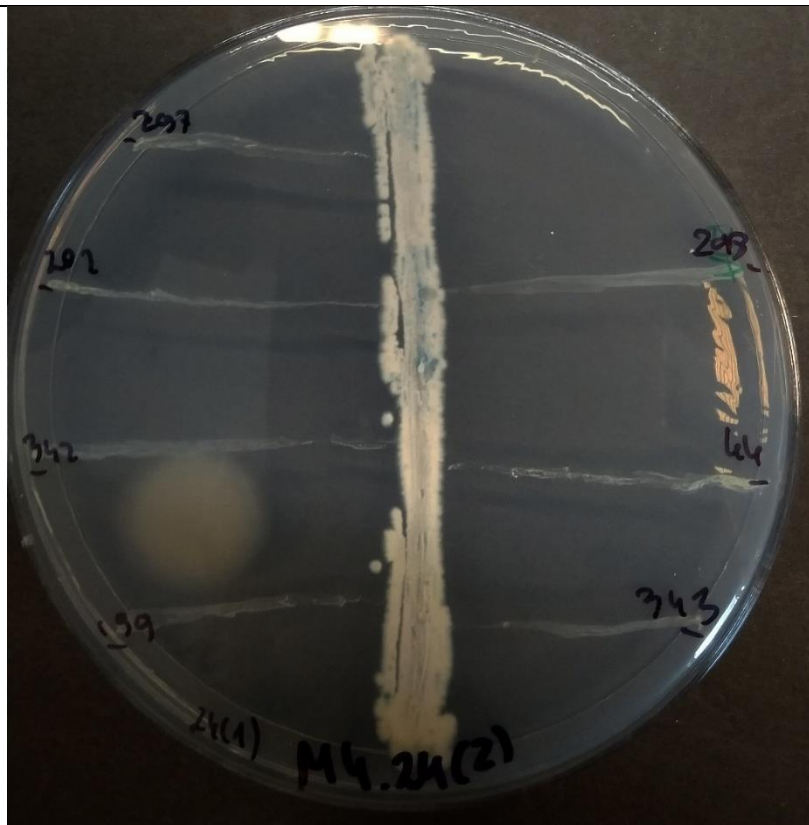

M4\_24 24h I

*Staphylococcus aureus*  
MRSA 298 (Medical  
University of Gdańsk)

*Staphylococcus aureus*  
MRSA 44 (Medical  
University of Gdańsk)

*Staphylococcus aureus*  
MRSA 343 (Medical  
University of Gdańsk)

*Staphylococcus aureus*  
MRSA 352 (Medical  
University of Gdańsk)

*Staphylococcus aureus*  
MRSA 116 (Medical  
University of Gdańsk)

*Staphylococcus aureus*  
MRSA 115 (Medical  
University of Gdańsk)

*Staphylococcus aureus*  
MRSA 122 (Medical  
University of Gdańsk)

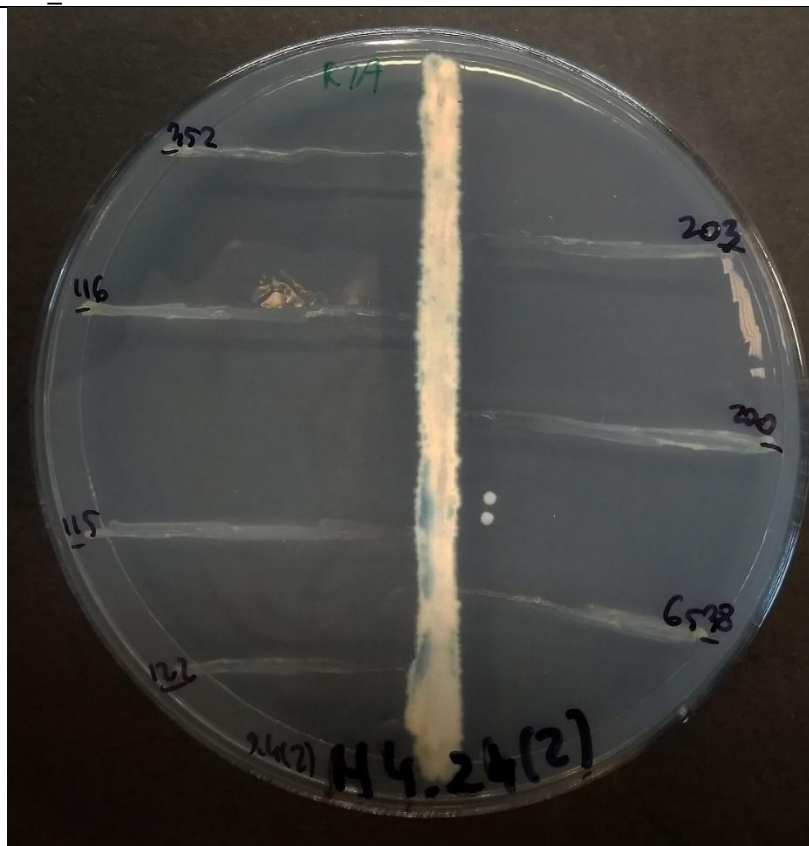

M4\_24 24h II

*Staphylococcus aureus*  
MRSA 203 (Medical  
University of Gdańsk)

*Staphylococcus aureus*  
MRSA 200 (Medical  
University of Gdańsk)

*Staphylococcus aureus*  
MRSA ATCC 6538 (Medical  
University of Gdańsk)

*Staphylococcus aureus*  
MRSA 271 (Medical  
University of Gdańsk)

*Staphylococcus aureus*  
MRSA 108 (Medical  
University of Gdańsk)

*Staphylococcus aureus*  
MRSA 124 (Medical  
University of Gdańsk)

*Staphylococcus aureus*  
MRSA 149 (Medical  
University of Gdańsk)

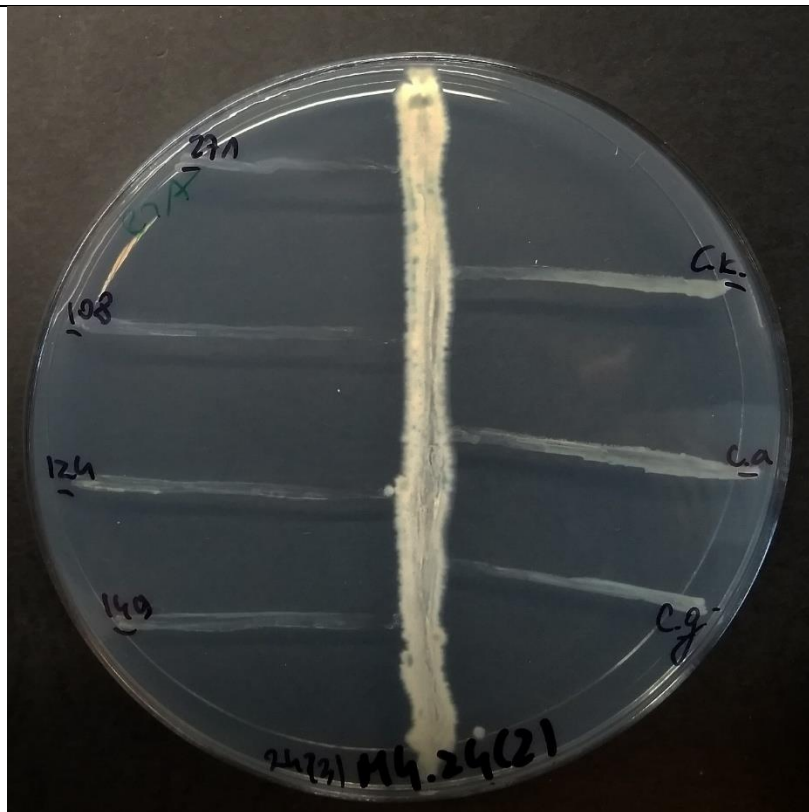

M4\_24 24h III

-  
-  
-  
(to są candida nieopisane  
w publikacji)

*Staphylococcus aureus*  
MRSA 297 (Medical  
University of Gdańsk)

*Staphylococcus aureus*  
MRSA 202 (Medical  
University of Gdańsk)

*Staphylococcus aureus*  
MRSA 342 (Medical  
University of Gdańsk)

*Staphylococcus aureus*  
MRSA 199 (Medical  
University of Gdańsk)

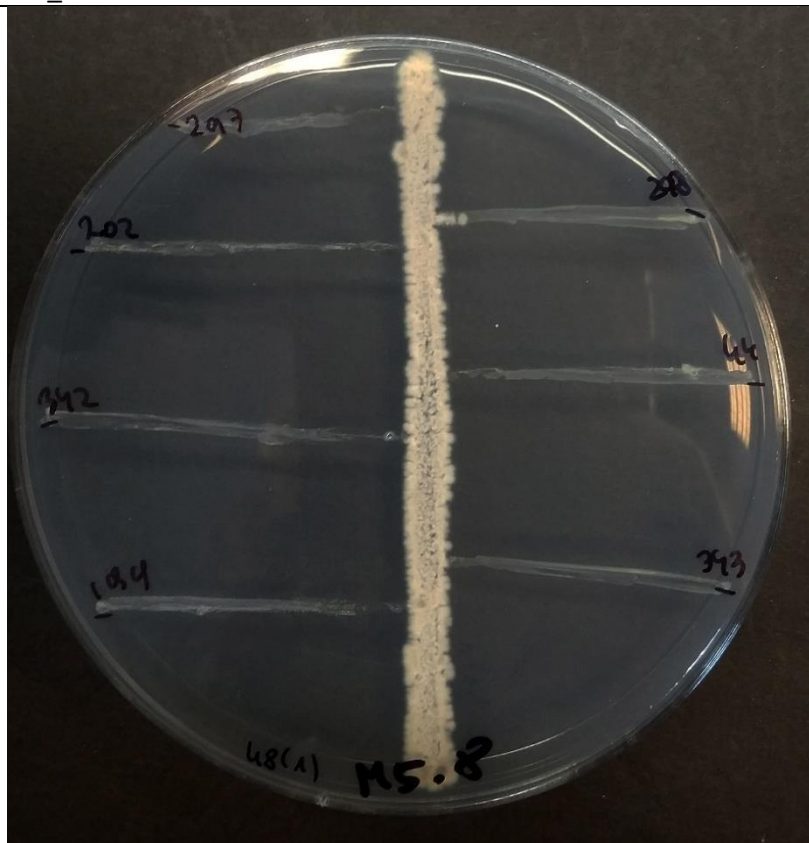

M5\_8 48h I

*Staphylococcus aureus*  
MRSA 298 (Medical  
University of Gdańsk)

*Staphylococcus aureus*  
MRSA 44 (Medical  
University of Gdańsk)

*Staphylococcus aureus*  
MRSA 343 (Medical  
University of Gdańsk)



*Staphylococcus aureus*  
MRSA 352 (Medical  
University of Gdańsk)

*Staphylococcus aureus*  
MRSA 116 (Medical  
University of Gdańsk)

*Staphylococcus aureus*  
MRSA 115 (Medical  
University of Gdańsk)

*Staphylococcus aureus*  
MRSA 122 (Medical  
University of Gdańsk)

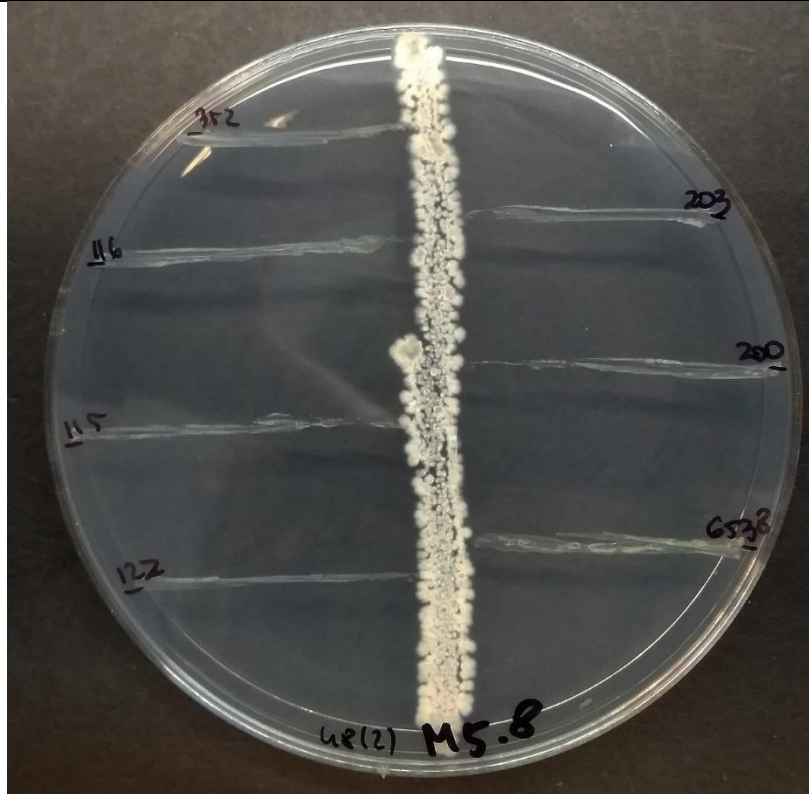

M5\_8 48h II

*Staphylococcus aureus*  
MRSA 203 (Medical  
University of Gdańsk)

*Staphylococcus aureus*  
MRSA 200 (Medical  
University of Gdańsk)

*Staphylococcus aureus*  
MRSA ATCC 6538 (Medical  
University of Gdańsk)

*Staphylococcus aureus*  
MRSA 271 (Medical  
University of Gdańsk)

*Staphylococcus aureus*  
MRSA 108 (Medical  
University of Gdańsk)

*Staphylococcus aureus*  
MRSA 124 (Medical  
University of Gdańsk)

*Staphylococcus aureus*  
MRSA 149 (Medical  
University of Gdańsk)

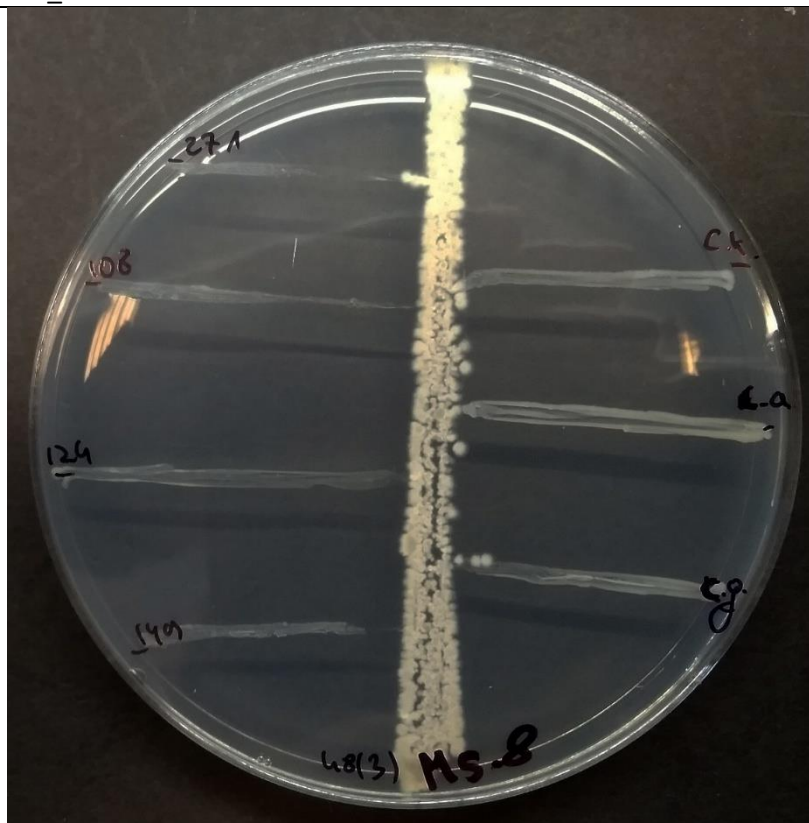

M5\_8 48h III

-  
-  
-  
(to są candida nieopisane  
w publikacji)

|                                                                                                                                                                                                                                                                                                                                                 |                                                                                                         |                                                                                                                                                                                                                                                                   |
|-------------------------------------------------------------------------------------------------------------------------------------------------------------------------------------------------------------------------------------------------------------------------------------------------------------------------------------------------|---------------------------------------------------------------------------------------------------------|-------------------------------------------------------------------------------------------------------------------------------------------------------------------------------------------------------------------------------------------------------------------|
| <p><i>Staphylococcus aureus</i><br/>MRSA 297 (Medical<br/>University of Gdańsk)</p> <p><i>Staphylococcus aureus</i><br/>MRSA 202 (Medical<br/>University of Gdańsk)</p> <p><i>Staphylococcus aureus</i><br/>MRSA 342 (Medical<br/>University of Gdańsk)</p> <p><i>Staphylococcus aureus</i><br/>MRSA 199 (Medical<br/>University of Gdańsk)</p> | 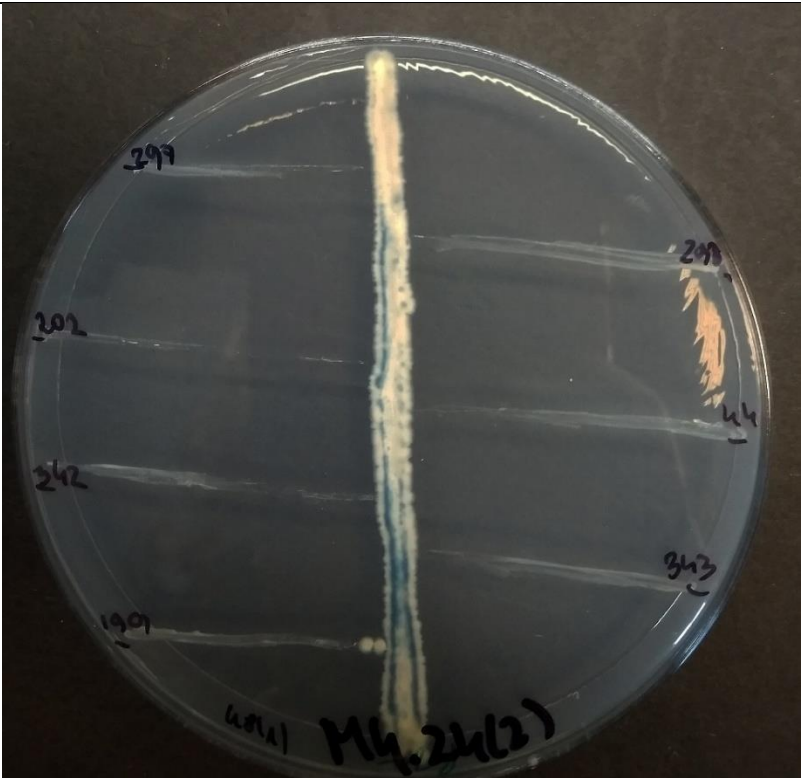 <p>M4_24 48h I</p>    | <p><i>Staphylococcus aureus</i><br/>MRSA 298 (Medical<br/>University of Gdańsk)</p> <p><i>Staphylococcus aureus</i><br/>MRSA 44 (Medical<br/>University of Gdańsk)</p> <p><i>Staphylococcus aureus</i><br/>MRSA 343 (Medical<br/>University of Gdańsk)</p>        |
| <p><i>Staphylococcus aureus</i><br/>MRSA 352 (Medical<br/>University of Gdańsk)</p> <p><i>Staphylococcus aureus</i><br/>MRSA 116 (Medical<br/>University of Gdańsk)</p> <p><i>Staphylococcus aureus</i><br/>MRSA 115 (Medical<br/>University of Gdańsk)</p> <p><i>Staphylococcus aureus</i><br/>MRSA 122 (Medical<br/>University of Gdańsk)</p> |  <p>M4_24 48h II</p> | <p><i>Staphylococcus aureus</i><br/>MRSA 203 (Medical<br/>University of Gdańsk)</p> <p><i>Staphylococcus aureus</i><br/>MRSA 200 (Medical<br/>University of Gdańsk)</p> <p><i>Staphylococcus aureus</i><br/>MRSA ATCC 6538 (Medical<br/>University of Gdańsk)</p> |

*Staphylococcus aureus*  
MRSA 271 (Medical  
University of Gdańsk)

*Staphylococcus aureus*  
MRSA 108 (Medical  
University of Gdańsk)

*Staphylococcus aureus*  
MRSA 124 (Medical  
University of Gdańsk)

*Staphylococcus aureus*  
MRSA 149 (Medical  
University of Gdańsk)

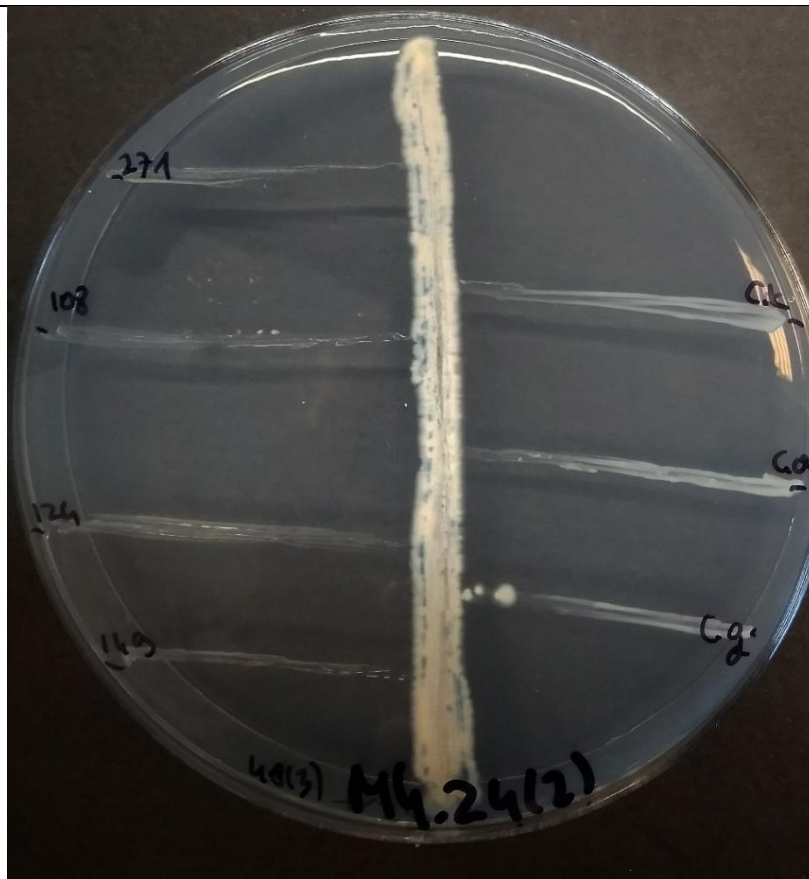

M4\_24 48h III

-  
-  
-  
(to są candida nieopisane  
w publikacji)

*Staphylococcus aureus*  
MRSA 297 (Medical  
University of Gdańsk)

*Staphylococcus aureus*  
MRSA 202 (Medical  
University of Gdańsk)

*Staphylococcus aureus*  
MRSA 342 (Medical  
University of Gdańsk)

*Staphylococcus aureus*  
MRSA 199 (Medical  
University of Gdańsk)

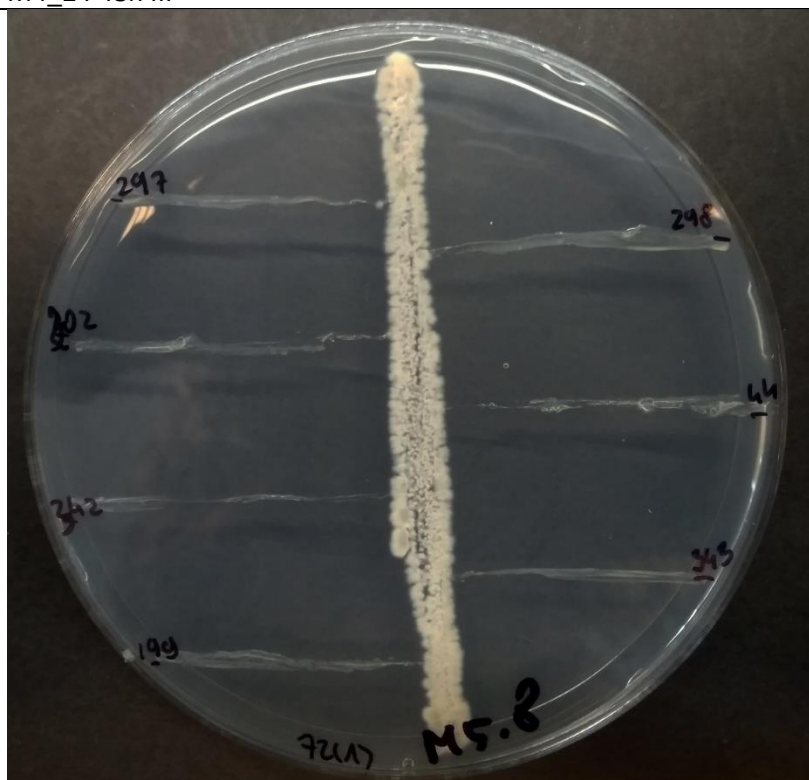

M5\_8 72h I

*Staphylococcus aureus*  
MRSA 298 (Medical  
University of Gdańsk)

*Staphylococcus aureus*  
MRSA 44 (Medical  
University of Gdańsk)

*Staphylococcus aureus*  
MRSA 343 (Medical  
University of Gdańsk)



*Staphylococcus aureus*  
MRSA 352 (Medical  
University of Gdańsk)

*Staphylococcus aureus*  
MRSA 116 (Medical  
University of Gdańsk)

*Staphylococcus aureus*  
MRSA 115 (Medical  
University of Gdańsk)

*Staphylococcus aureus*  
MRSA 122 (Medical  
University of Gdańsk)

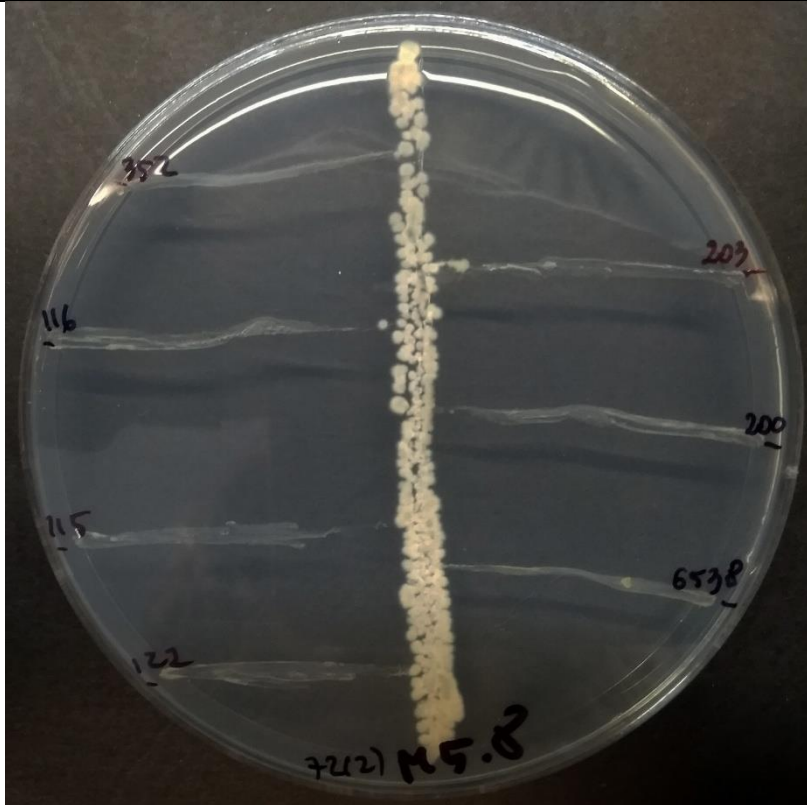

M5\_8 72h II

*Staphylococcus aureus*  
MRSA 203 (Medical  
University of Gdańsk)

*Staphylococcus aureus*  
MRSA 200 (Medical  
University of Gdańsk)

*Staphylococcus aureus*  
MRSA ATCC 6538 (Medical  
University of Gdańsk)

*Staphylococcus aureus*  
MRSA 271 (Medical  
University of Gdańsk)

*Staphylococcus aureus*  
MRSA 108 (Medical  
University of Gdańsk)

*Staphylococcus aureus*  
MRSA 124 (Medical  
University of Gdańsk)

*Staphylococcus aureus*  
MRSA 149 (Medical  
University of Gdańsk)

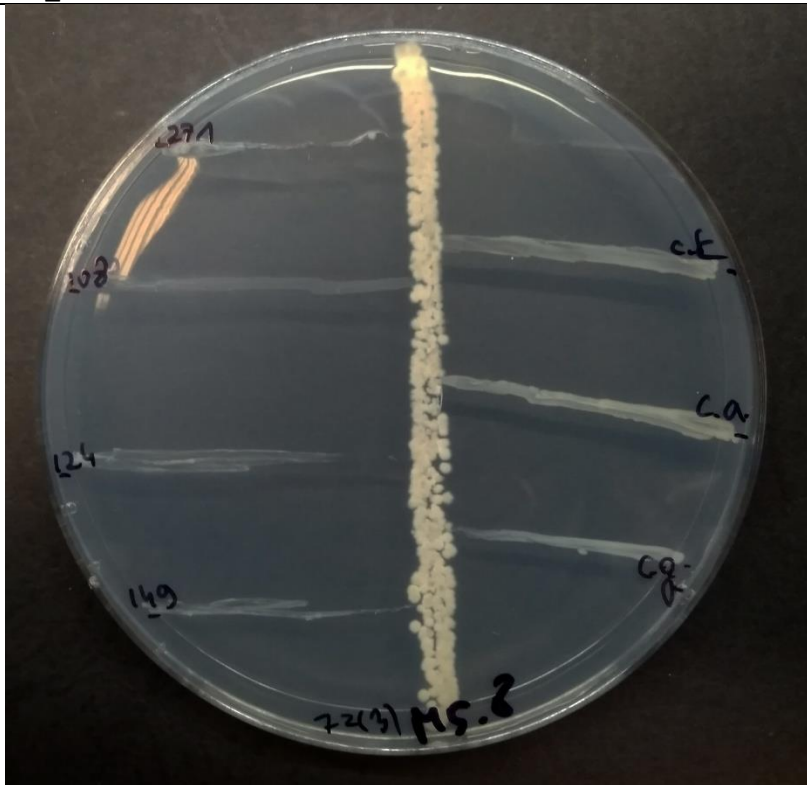

M5\_8 72h III

-  
-  
-  
(to są candida nieopisane  
w publikacji)



|                                                                                                                                                                                                                                                                                                                                                 |                                                                                                         |                                                                                                                                                                                                                                                                   |
|-------------------------------------------------------------------------------------------------------------------------------------------------------------------------------------------------------------------------------------------------------------------------------------------------------------------------------------------------|---------------------------------------------------------------------------------------------------------|-------------------------------------------------------------------------------------------------------------------------------------------------------------------------------------------------------------------------------------------------------------------|
| <p><i>Staphylococcus aureus</i><br/>MRSA 297 (Medical<br/>University of Gdańsk)</p> <p><i>Staphylococcus aureus</i><br/>MRSA 202 (Medical<br/>University of Gdańsk)</p> <p><i>Staphylococcus aureus</i><br/>MRSA 342 (Medical<br/>University of Gdańsk)</p> <p><i>Staphylococcus aureus</i><br/>MRSA 199 (Medical<br/>University of Gdańsk)</p> | 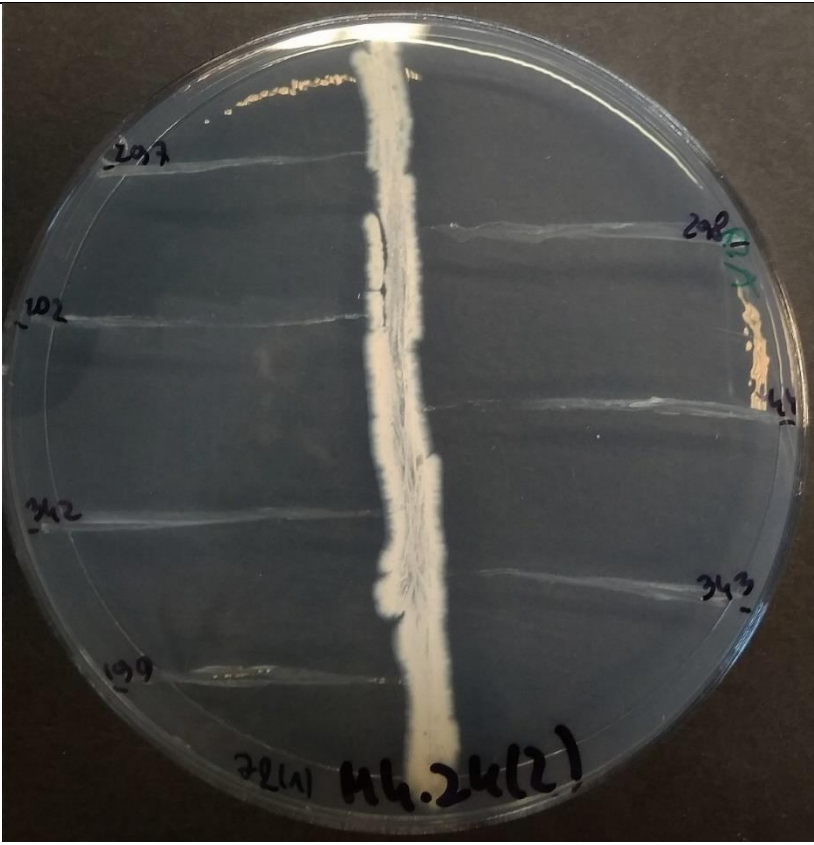 <p>M4_24 72h I</p>    | <p><i>Staphylococcus aureus</i><br/>MRSA 298 (Medical<br/>University of Gdańsk)</p> <p><i>Staphylococcus aureus</i><br/>MRSA 44 (Medical<br/>University of Gdańsk)</p> <p><i>Staphylococcus aureus</i><br/>MRSA 343 (Medical<br/>University of Gdańsk)</p>        |
| <p><i>Staphylococcus aureus</i><br/>MRSA 352 (Medical<br/>University of Gdańsk)</p> <p><i>Staphylococcus aureus</i><br/>MRSA 116 (Medical<br/>University of Gdańsk)</p> <p><i>Staphylococcus aureus</i><br/>MRSA 115 (Medical<br/>University of Gdańsk)</p> <p><i>Staphylococcus aureus</i><br/>MRSA 122 (Medical<br/>University of Gdańsk)</p> |  <p>M4_24 72h II</p> | <p><i>Staphylococcus aureus</i><br/>MRSA 203 (Medical<br/>University of Gdańsk)</p> <p><i>Staphylococcus aureus</i><br/>MRSA 200 (Medical<br/>University of Gdańsk)</p> <p><i>Staphylococcus aureus</i><br/>MRSA ATCC 6538 (Medical<br/>University of Gdańsk)</p> |

*Staphylococcus aureus*  
MRSA 271 (Medical  
University of Gdańsk)

*Staphylococcus aureus*  
MRSA 108 (Medical  
University of Gdańsk)

*Staphylococcus aureus*  
MRSA 124 (Medical  
University of Gdańsk)

*Staphylococcus aureus*  
MRSA 149 (Medical  
University of Gdańsk)

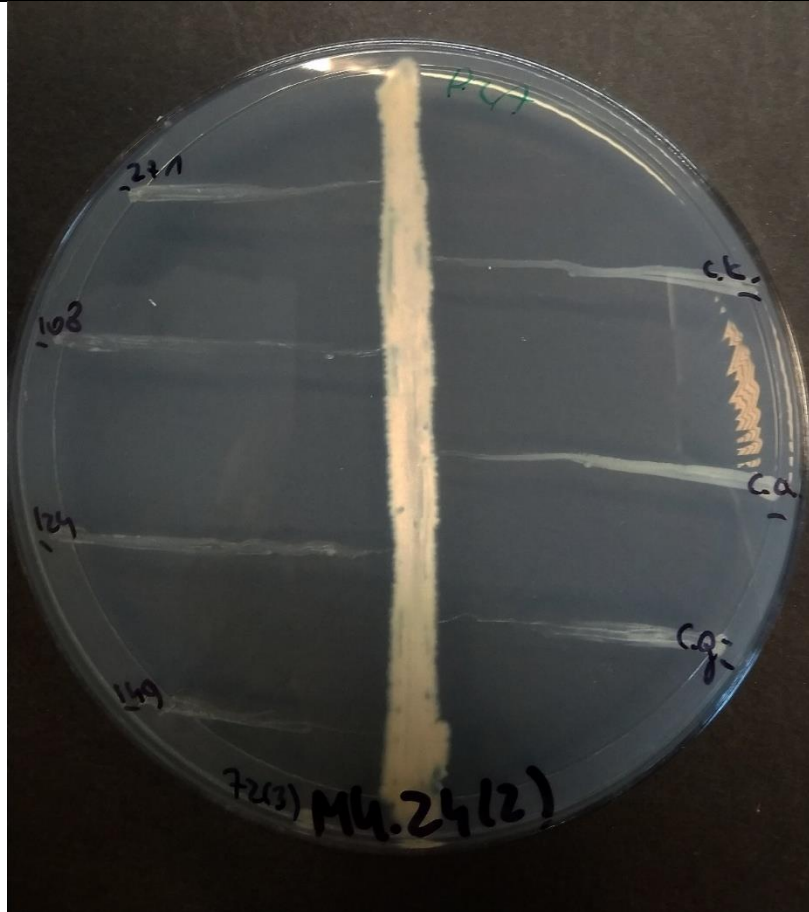

M4\_24 72h III

-  
-  
-  
(to są candida nieopisane  
w publikacji)

*Salmonella enterica* Dubin  
65 (National Salmonella  
Center, Gdańsk, Poland)

*Salmonella enterica*  
Saindpaul 435 (National  
Salmonella Center, Gdańsk,  
Poland)

*Salmonella enterica*  
Enteritidis 1392 (National  
Salmonella Center, Gdańsk,  
Poland)

*Salmonella enterica*  
Newport 51 (National  
Salmonella Center, Gdańsk,  
Poland)

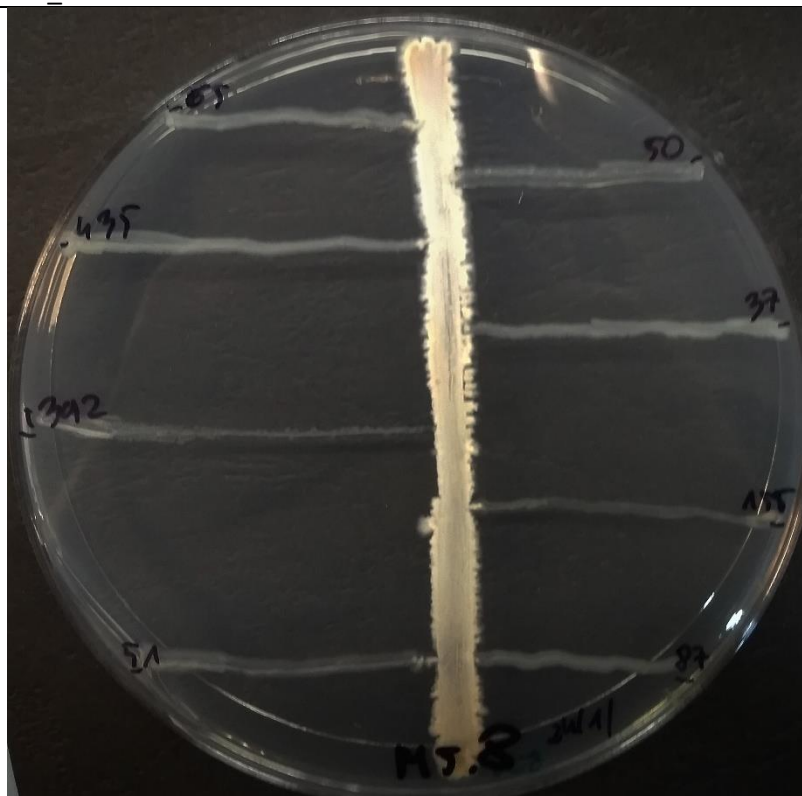

M5\_8 24h I

*Salmonella enterica*  
Newport 50 (National  
Salmonella Center, Gdańsk,  
Poland)

*Salmonella enterica*  
Cholerasuis 37 (National  
Salmonella Center, Gdańsk,  
Poland)

*Salmonella enterica* Infantis  
155 (National Salmonella  
Center, Gdańsk, Poland)

*Salmonella enterica*  
Seftenberg 87 (National  
Salmonella Center, Gdańsk,  
Poland)

*Salmonella enterica*  
Bovismorbificans 300  
(National Salmonella  
Center, Gdańsk, Poland)

*Salmonella enterica*  
Gallinarum 74 (National  
Salmonella Center, Gdańsk,  
Poland)

*Salmonella enterica*  
Cholerasuis 39 (National  
Salmonella Center, Gdańsk,  
Poland)

*Salmonella enterica* Hadar  
1784 (National Salmonella  
Center, Gdańsk, Poland)

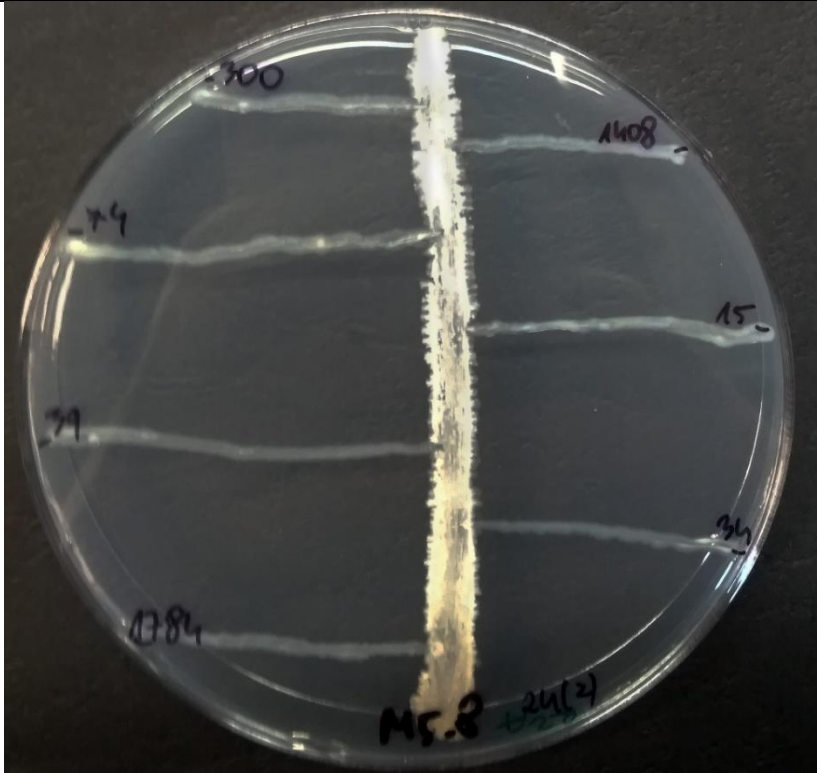

M5\_8 24h II

*Salmonella enterica* Agona  
1408 (National Salmonella  
Center, Gdańsk, Poland)

-

-

*Salmonella enterica*  
Typhimurium 13 (National  
Salmonella Center, Gdańsk,  
Poland)

*Salmonella enterica*  
Typhimurium 12 (National  
Salmonella Center, Gdańsk,  
Poland)

-

*Salmonella enterica*  
Cholerasuis 1439 (National  
Salmonella Center, Gdańsk,  
Poland)

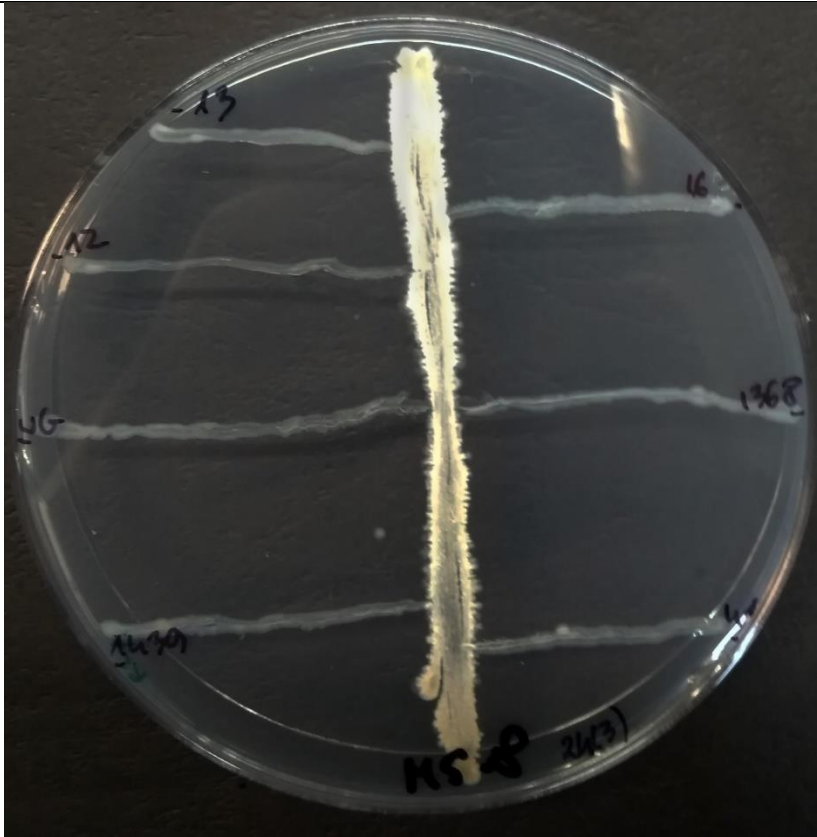

M5\_8 24h III

*Salmonella enterica*  
Heidelberg 16 (National  
Salmonella Center, Gdańsk,  
Poland)

*Salmonella enterica*  
Kentucky 1368 (National  
Salmonella Center, Gdańsk,  
Poland)

*Salmonella enterica*  
Virchow 41 (National  
Salmonella Center, Gdańsk,  
Poland)



*Salmonella enterica*  
Enteritidis 64 (National  
Salmonella Center, Gdańsk,  
Poland)

-  
-  
-

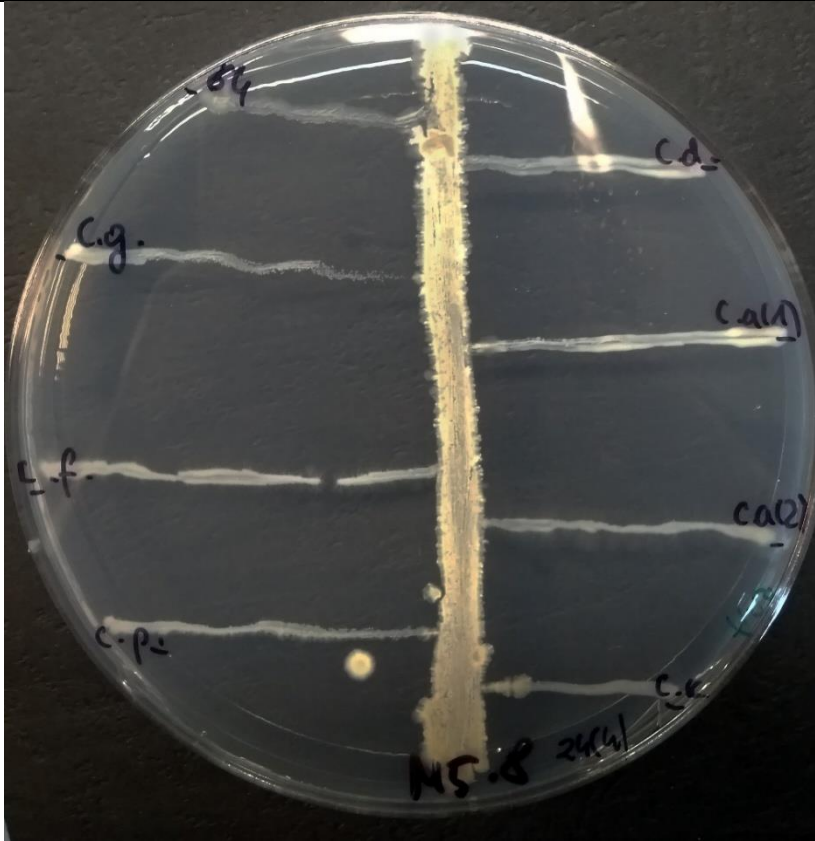

M5\_8 24h IV

*Salmonella enterica* Dubin  
65 (National Salmonella  
Center, Gdańsk, Poland)

*Salmonella enterica*  
Saindpaul 435 (National  
Salmonella Center, Gdańsk,  
Poland)

*Salmonella enterica*  
Enteritidis 1392 (National  
Salmonella Center, Gdańsk,  
Poland)

*Salmonella enterica*  
Newport 51 (National  
Salmonella Center, Gdańsk,  
Poland)

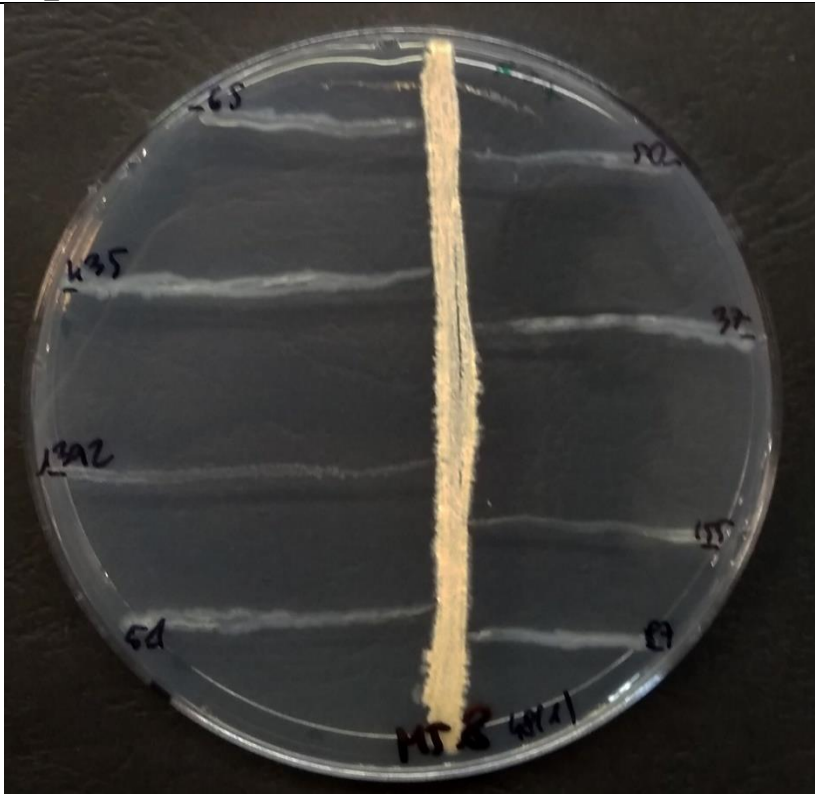

M5\_8 48h I

*Salmonella enterica*  
Newport 50 (National  
Salmonella Center, Gdańsk,  
Poland)

*Salmonella enterica*  
Cholerasuis 37 (National  
Salmonella Center, Gdańsk,  
Poland)

*Salmonella enterica* Infantis  
155 (National Salmonella  
Center, Gdańsk, Poland)

*Salmonella enterica*  
Seftenberg 87 (National  
Salmonella Center, Gdańsk,  
Poland)

*Salmonella enterica*  
Bovismorbificans 300  
(National Salmonella  
Center, Gdańsk, Poland)

*Salmonella enterica*  
Gallinarum 74 (National  
Salmonella Center, Gdańsk,  
Poland)

*Salmonella enterica*  
Cholerasuis 39 (National  
Salmonella Center, Gdańsk,  
Poland)

*Salmonella enterica* Hadar  
1784 (National Salmonella  
Center, Gdańsk, Poland)

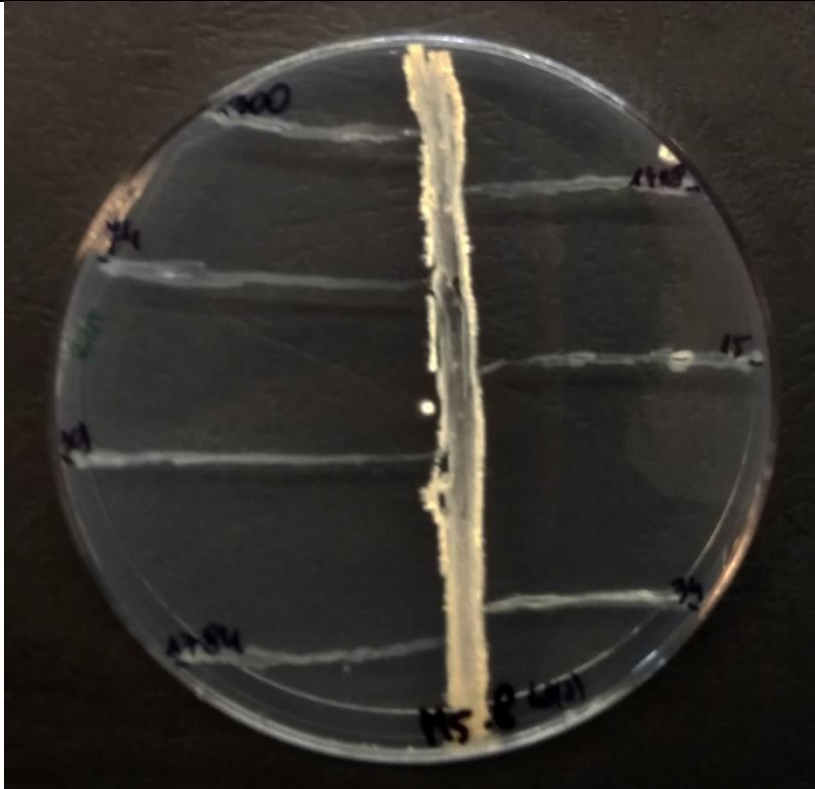

M5\_8 48h II

*Salmonella enterica* Agona  
1408 (National Salmonella  
Center, Gdańsk, Poland)

-

-

*Salmonella enterica*  
Typhimurium 13 (National  
Salmonella Center, Gdańsk,  
Poland)

*Salmonella enterica*  
Typhimurium 12 (National  
Salmonella Center, Gdańsk,  
Poland)

-

*Salmonella enterica*  
Cholerasuis 1439 (National  
Salmonella Center, Gdańsk,  
Poland)

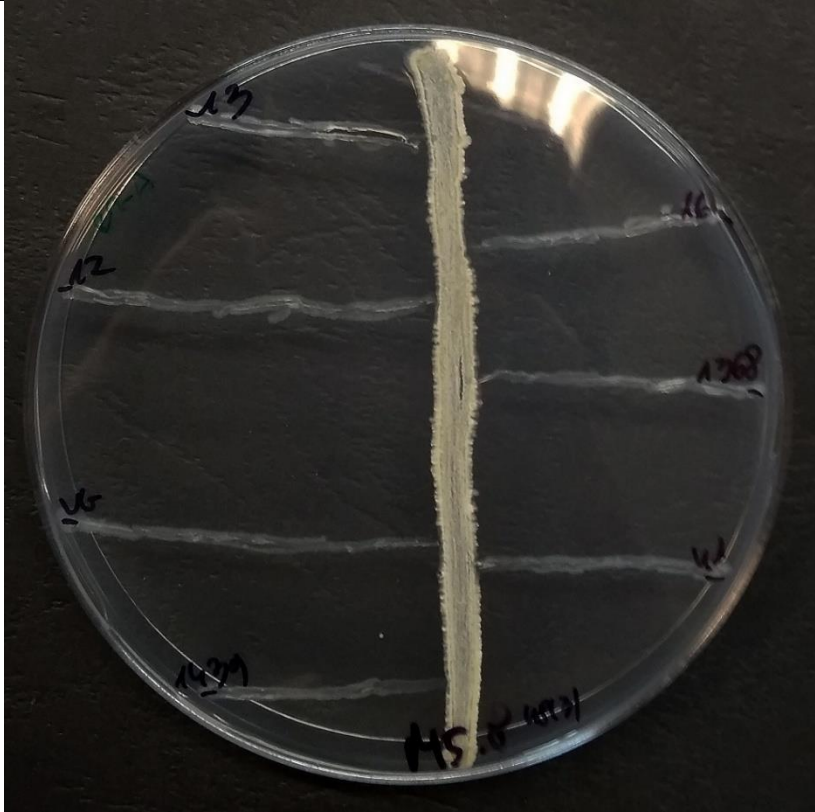

M5\_8 48h III

*Salmonella enterica*  
Heidelberg 16 (National  
Salmonella Center, Gdańsk,  
Poland)

*Salmonella enterica*  
Kentucky 1368 (National  
Salmonella Center, Gdańsk,  
Poland)

*Salmonella enterica*  
Virchow 41 (National  
Salmonella Center, Gdańsk,  
Poland)

*Salmonella enterica*  
Enteritidis 64 (National  
Salmonella Center, Gdańsk,  
Poland)

-  
-  
-

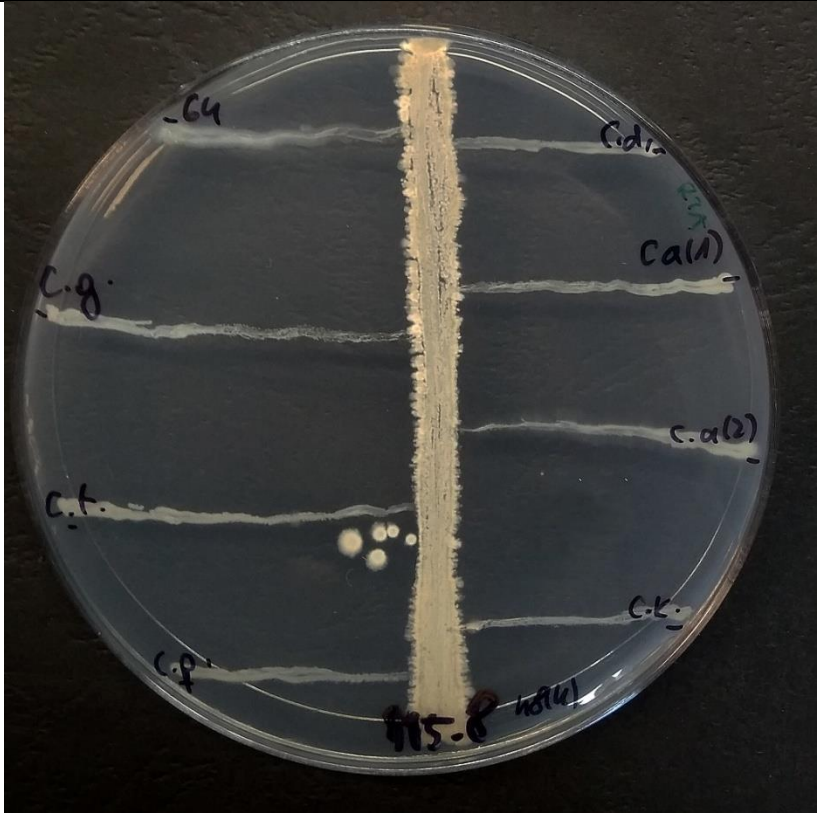

-  
-  
-  
-

M5\_8 48h IV

*Salmonella enterica* Dubin  
65 (National Salmonella  
Center, Gdańsk, Poland)

*Salmonella enterica*  
Saindpaul 435 (National  
Salmonella Center, Gdańsk,  
Poland)

*Salmonella enterica*  
Enteritidis 1392 (National  
Salmonella Center, Gdańsk,  
Poland)

*Salmonella enterica*  
Newport 51 (National  
Salmonella Center, Gdańsk,  
Poland)

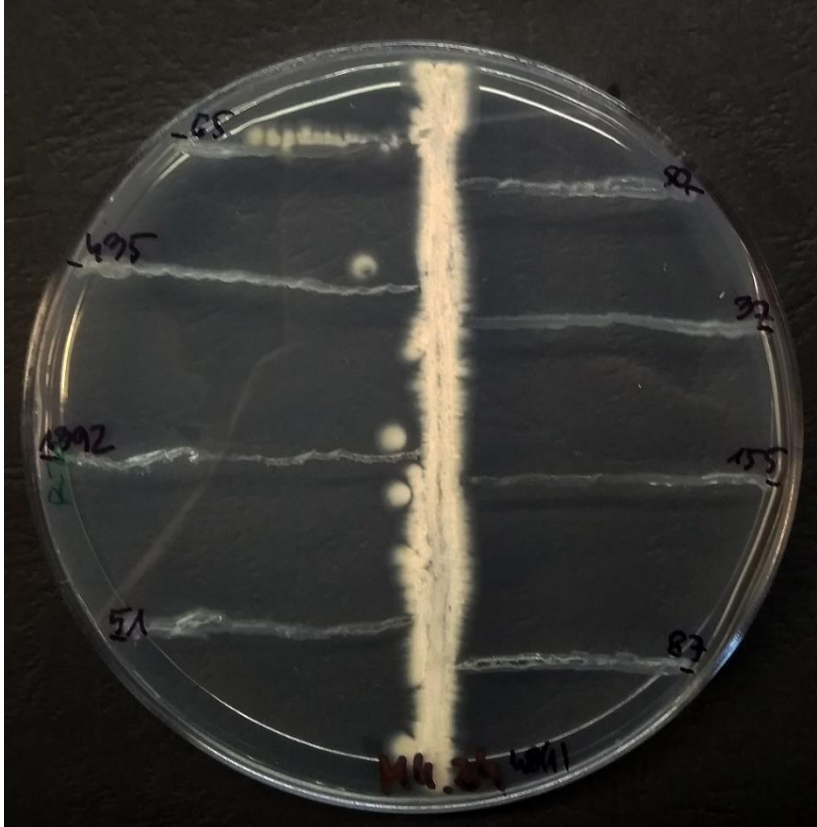

M4\_24 48h I

*Salmonella enterica*  
Newport 50 (National  
Salmonella Center, Gdańsk,  
Poland)

*Salmonella enterica*  
Cholerasuis 37 (National  
Salmonella Center, Gdańsk,  
Poland)

*Salmonella enterica* Infantis  
155 (National Salmonella  
Center, Gdańsk, Poland)

*Salmonella enterica*  
Seftenberg 87 (National  
Salmonella Center, Gdańsk,  
Poland)



*Salmonella enterica*  
Bovismorbificans 300  
(National Salmonella  
Center, Gdańsk, Poland)

*Salmonella enterica*  
Gallinarum 74 (National  
Salmonella Center, Gdańsk,  
Poland)

*Salmonella enterica*  
Cholerasuis 39 (National  
Salmonella Center, Gdańsk,  
Poland)

*Salmonella enterica* Hadar  
1784 (National Salmonella  
Center, Gdańsk, Poland)

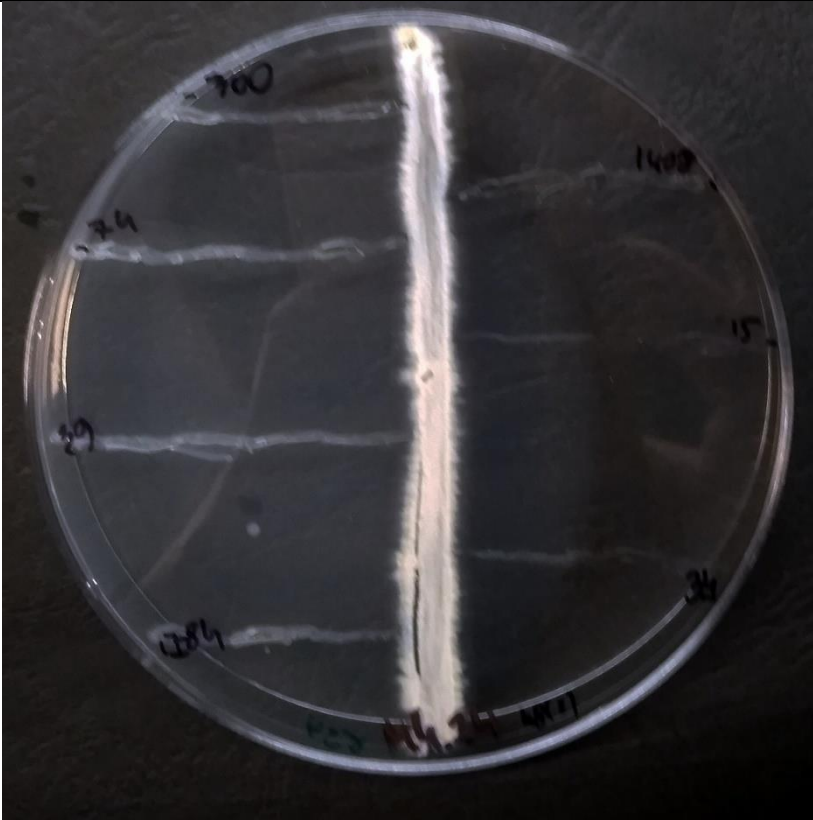

M4\_24 48h II

*Salmonella enterica* Agona  
1408 (National Salmonella  
Center, Gdańsk, Poland)

-

-

*Salmonella enterica*  
Typhimurium 13 (National  
Salmonella Center, Gdańsk,  
Poland)

*Salmonella enterica*  
Typhimurium 12 (National  
Salmonella Center, Gdańsk,  
Poland)

-

*Salmonella enterica*  
Cholerasuis 1439 (National  
Salmonella Center, Gdańsk,  
Poland)

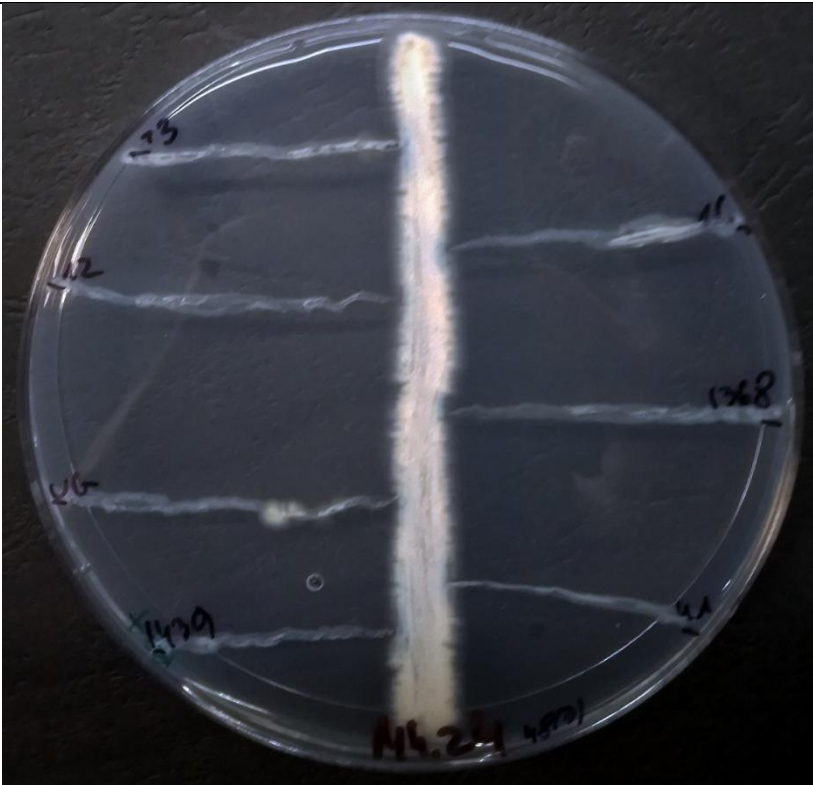

M4\_24 48h III

*Salmonella enterica*  
Heidelberg 16 (National  
Salmonella Center, Gdańsk,  
Poland)

*Salmonella enterica*  
Kentucky 1368 (National  
Salmonella Center, Gdańsk,  
Poland)

*Salmonella enterica*  
Virchow 41 (National  
Salmonella Center, Gdańsk,  
Poland)

*Salmonella enterica*  
Enteritidis 64 (National  
Salmonella Center, Gdańsk,  
Poland)

-  
-  
-

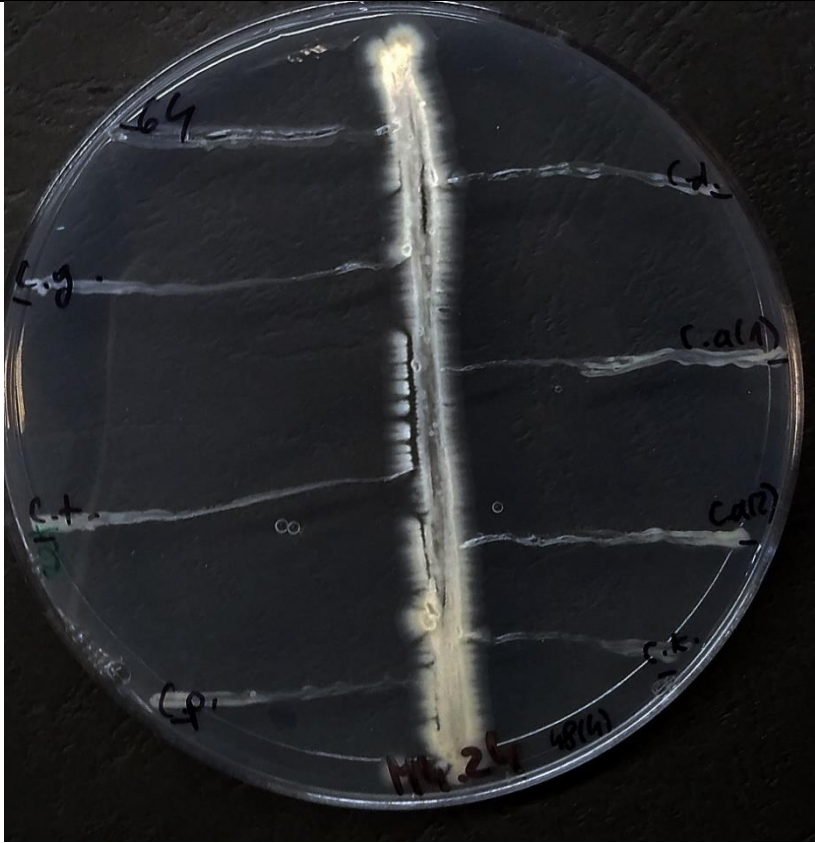

M4\_24 48h IV

-  
-  
-  
-

*Salmonella enterica* Dubin  
65 (National Salmonella  
Center, Gdańsk, Poland)

*Salmonella enterica*  
Saindpaul 435 (National  
Salmonella Center, Gdańsk,  
Poland)

*Salmonella enterica*  
Enteritidis 1392 (National  
Salmonella Center, Gdańsk,  
Poland)

*Salmonella enterica*  
Newport 51 (National  
Salmonella Center, Gdańsk,  
Poland)

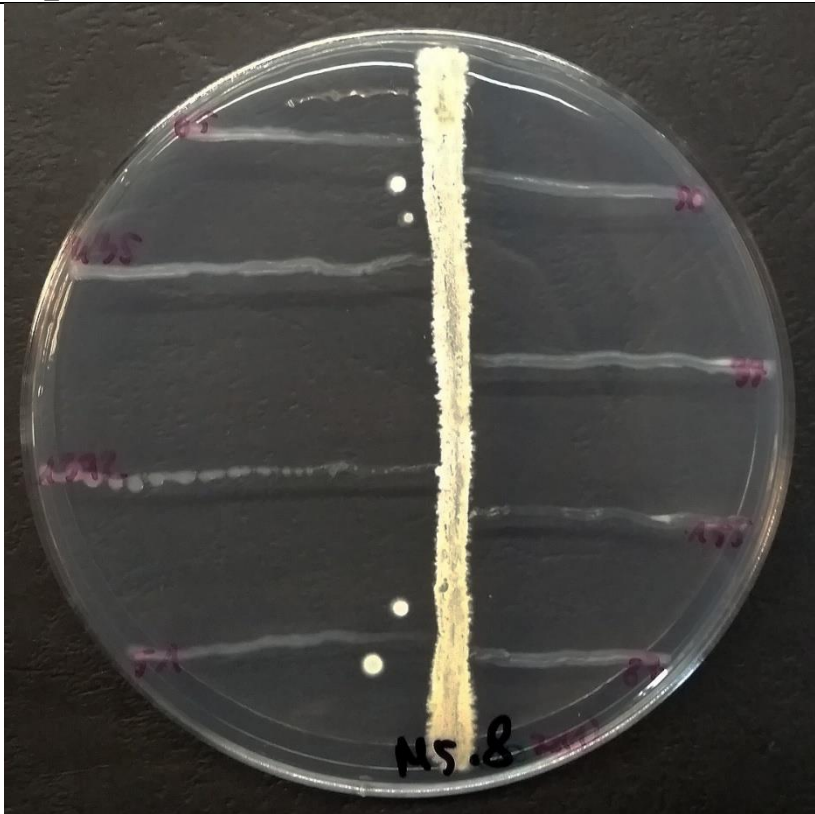

M5\_8 72h I

*Salmonella enterica*  
Newport 50 (National  
Salmonella Center, Gdańsk,  
Poland)

*Salmonella enterica*  
Cholerasuis 37 (National  
Salmonella Center, Gdańsk,  
Poland)

*Salmonella enterica* Infantis  
155 (National Salmonella  
Center, Gdańsk, Poland)

*Salmonella enterica*  
Seftenberg 87 (National  
Salmonella Center, Gdańsk,  
Poland)

*Salmonella enterica*  
Bovismorbificans 300  
(National Salmonella  
Center, Gdańsk, Poland)

*Salmonella enterica*  
Gallinarum 74 (National  
Salmonella Center, Gdańsk,  
Poland)

*Salmonella enterica*  
Cholerasuis 39 (National  
Salmonella Center, Gdańsk,  
Poland)

*Salmonella enterica* Hadar  
1784 (National Salmonella  
Center, Gdańsk, Poland)

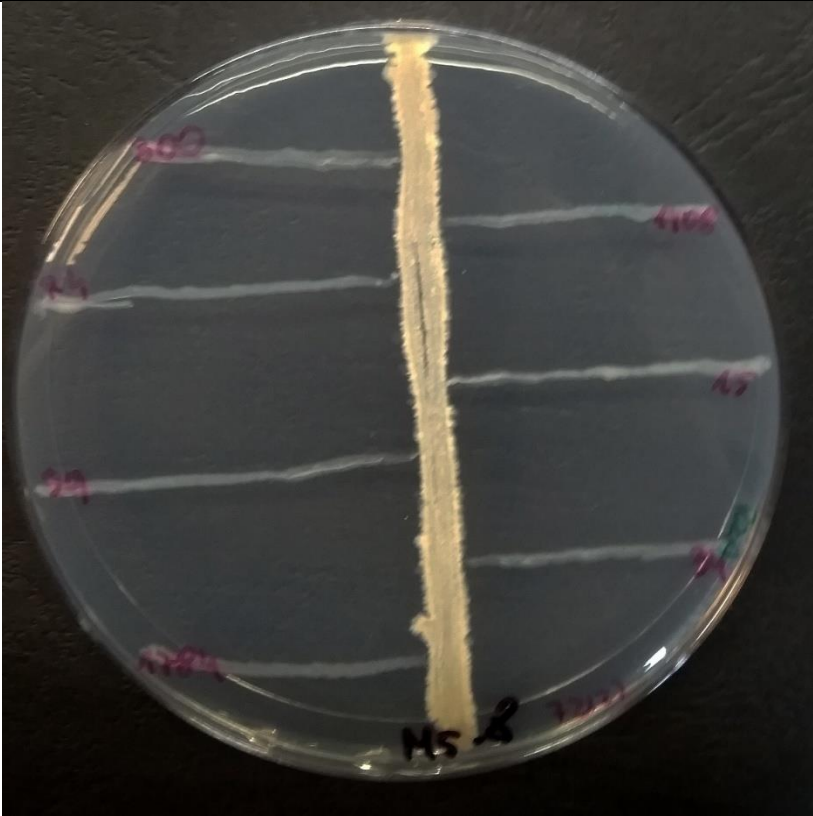

M5\_8 72h II

*Salmonella enterica* Agona  
1408 (National Salmonella  
Center, Gdańsk, Poland)

-

-

*Salmonella enterica*  
Typhimurium 13 (National  
Salmonella Center, Gdańsk,  
Poland)

*Salmonella enterica*  
Typhimurium 12 (National  
Salmonella Center, Gdańsk,  
Poland)

-

*Salmonella enterica*  
Cholerasuis 1439 (National  
Salmonella Center, Gdańsk,  
Poland)

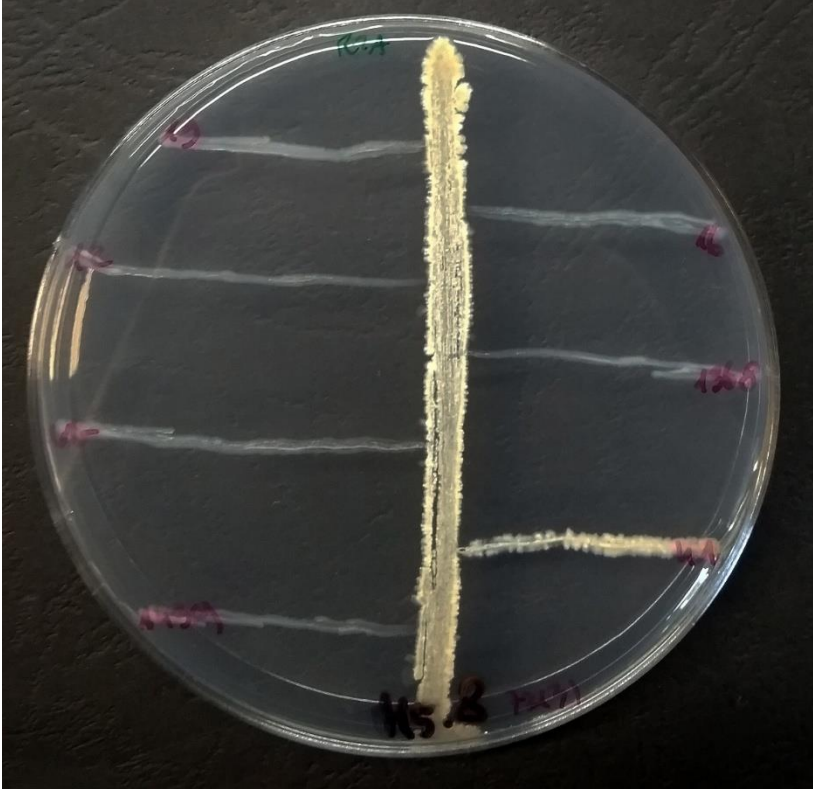

M5\_8 72h III

*Salmonella enterica*  
Heidelberg 16 (National  
Salmonella Center, Gdańsk,  
Poland)

*Salmonella enterica*  
Kentucky 1368 (National  
Salmonella Center, Gdańsk,  
Poland)

*Salmonella enterica*  
Virchow 41 (National  
Salmonella Center, Gdańsk,  
Poland)



*Salmonella enterica*  
Enteritidis 64 (National  
Salmonella Center, Gdańsk,  
Poland)

-  
-  
-

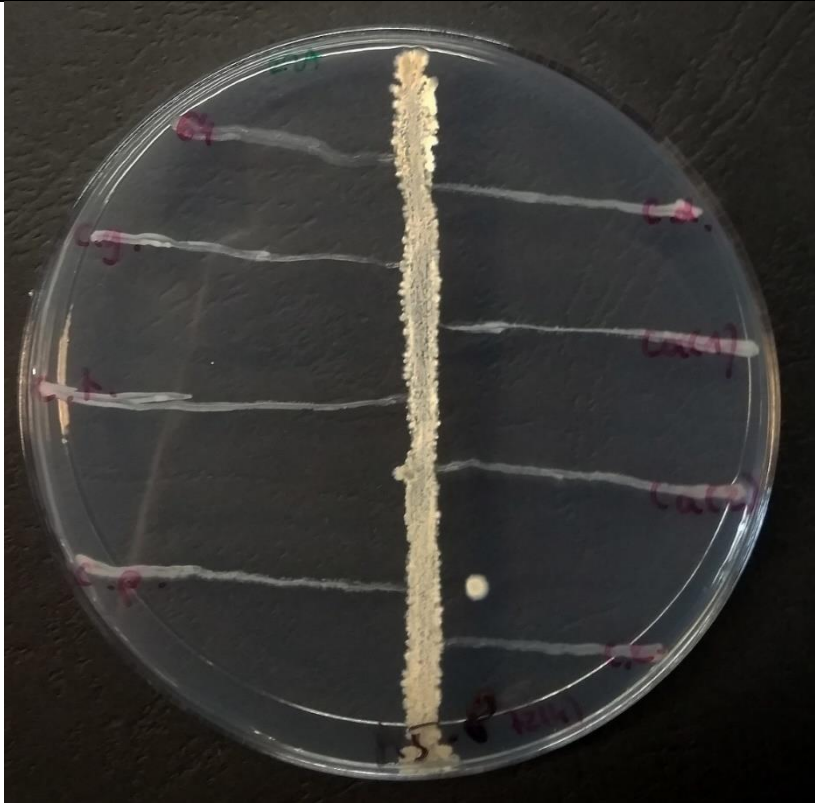

-  
-  
-  
-

M5\_8 72h IV

*Salmonella enterica* Dubin  
65 (National Salmonella  
Center, Gdańsk, Poland)

*Salmonella enterica*  
Saindpaul 435 (National  
Salmonella Center, Gdańsk,  
Poland)

*Salmonella enterica*  
Enteritidis 1392 (National  
Salmonella Center, Gdańsk,  
Poland)

*Salmonella enterica*  
Newport 51 (National  
Salmonella Center, Gdańsk,  
Poland)

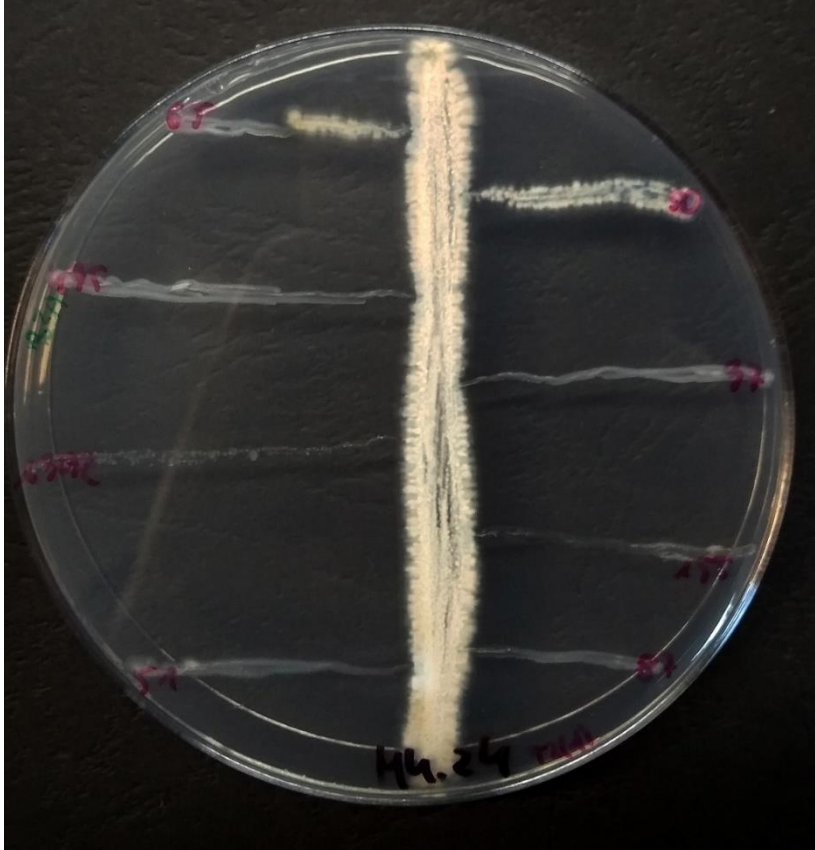

M4\_24 72h I

*Salmonella enterica*  
Newport 50 (National  
Salmonella Center, Gdańsk,  
Poland)

*Salmonella enterica*  
Cholerasuis 37 (National  
Salmonella Center, Gdańsk,  
Poland)

*Salmonella enterica* Infantis  
155 (National Salmonella  
Center, Gdańsk, Poland)

*Salmonella enterica*  
Seftenberg 87 (National  
Salmonella Center, Gdańsk,  
Poland)

*Salmonella enterica*  
Bovismorbificans 300  
(National Salmonella  
Center, Gdańsk, Poland)

*Salmonella enterica*  
Gallinarum 74 (National  
Salmonella Center, Gdańsk,  
Poland)

*Salmonella enterica*  
Cholerasuis 39 (National  
Salmonella Center, Gdańsk,  
Poland)

*Salmonella enterica* Hadar  
1784 (National Salmonella  
Center, Gdańsk, Poland)

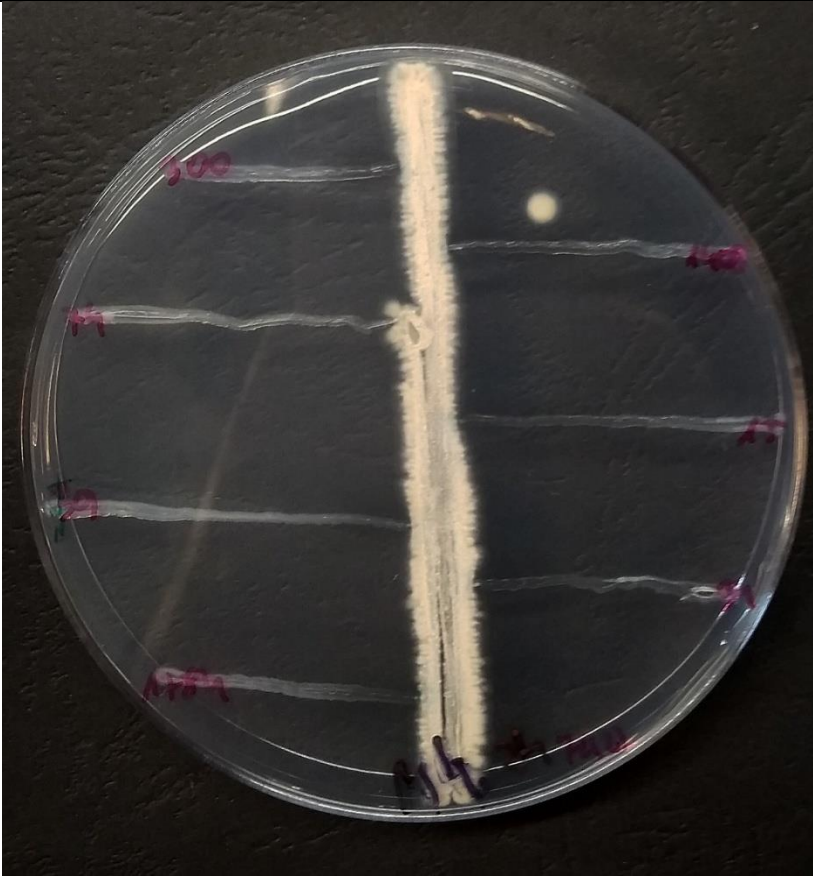

M4\_24 72h II

*Salmonella enterica* Agona  
1408 (National Salmonella  
Center, Gdańsk, Poland)

-

-

*Salmonella enterica*  
Typhimurium 13 (National  
Salmonella Center, Gdańsk,  
Poland)

*Salmonella enterica*  
Typhimurium 12 (National  
Salmonella Center, Gdańsk,  
Poland)

-

*Salmonella enterica*  
Cholerasuis 1439 (National  
Salmonella Center, Gdańsk,  
Poland)

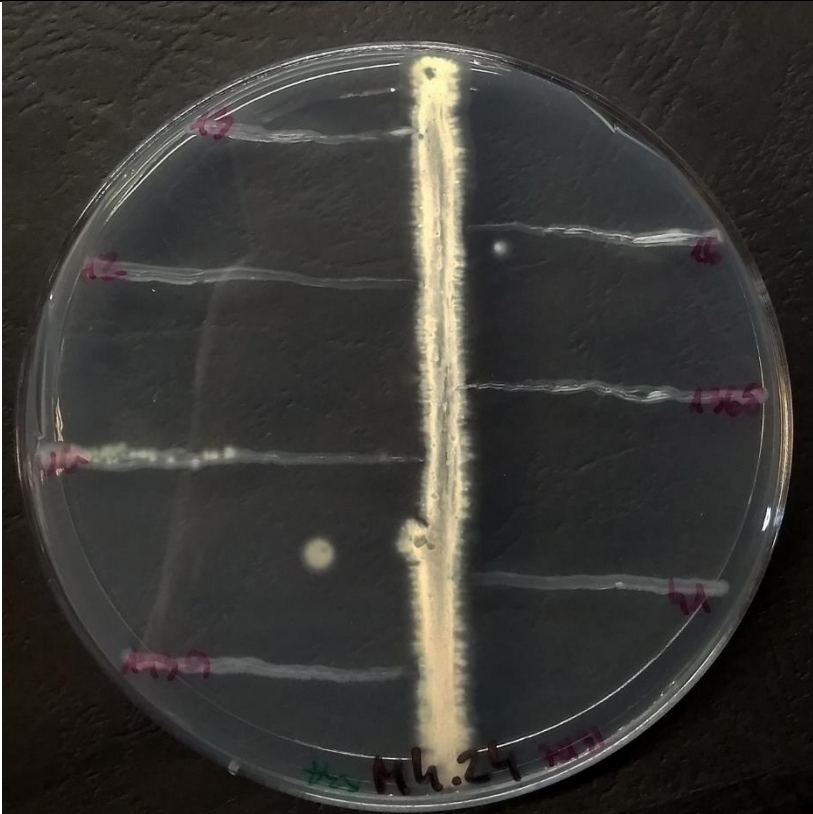

M4\_24 72h III

*Salmonella enterica*  
Heidelberg 16 (National  
Salmonella Center, Gdańsk,  
Poland)

*Salmonella enterica*  
Kentucky 1368 (National  
Salmonella Center, Gdańsk,  
Poland)

*Salmonella enterica*  
Virchow 41 (National  
Salmonella Center, Gdańsk,  
Poland)

|                                                                                                                                      |                                                                                   |                                     |
|--------------------------------------------------------------------------------------------------------------------------------------|-----------------------------------------------------------------------------------|-------------------------------------|
| <p><i>Salmonella enterica</i><br/>Enteritidis 64 (National<br/>Salmonella Center, Gdańsk,<br/>Poland)</p> <p>-</p> <p>-</p> <p>-</p> | 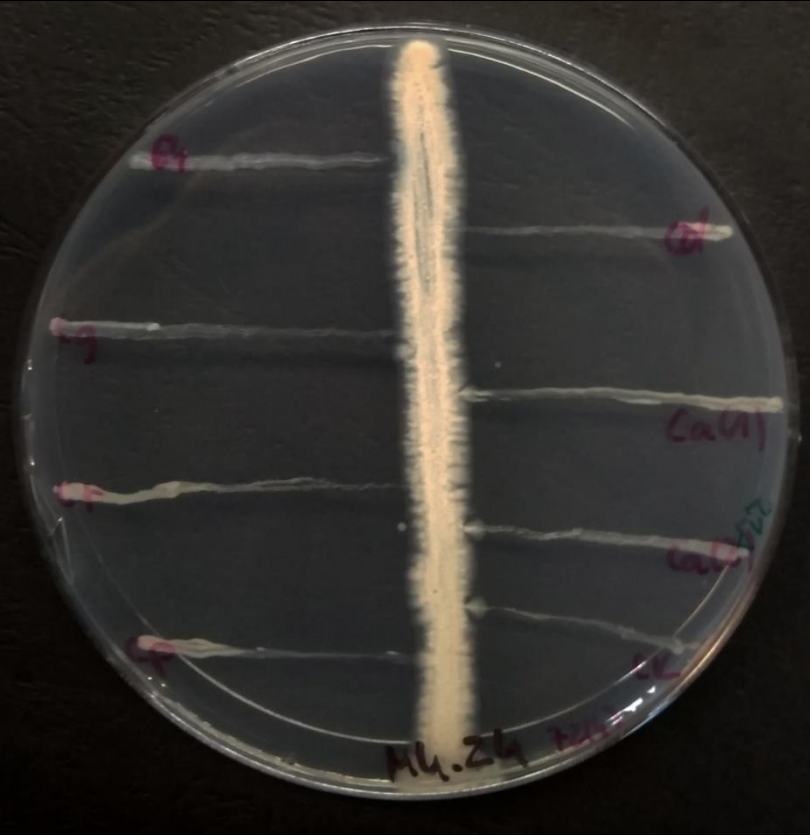 | <p>-</p> <p>-</p> <p>-</p> <p>-</p> |
|                                                                                                                                      | <p>M4_24 72h IV</p>                                                               |                                     |

**Figure S1.** Antibacterial and antifungal activities of newly isolated *Streptomyces* strains M4\_24 and M5\_8, as revealed by the streak-test. Name of the *Streptomyces* strain and time of incubation are shown at the bottom of each panel. Names of streaked bacterial and fungal strains (and their origin (collection)) are provided in left and right panels.
